# Supplementary material for: Selective and predicable amine conjugation sites by kinetic characterization under excess reagents
Source: PubMed Central journal article supplement (PMC8551328; doi:10.1038/s41598-021-00743-3), 2021-10-27

## Supporting Information

### Selective and Predictable Amine Conjugation Sites by Kinetic Characterization Under Excess Reagents

#### Table of Content

Figure S1. Effect of reducing agent on the yield of Her-IgG (5.73  $\mu$ M) conjugated with 2-(2-(2-(2-Azidoethoxy)ethoxy)ethoxy)acetaldehyde (AD-PEG-N<sub>3</sub>) linker (3.3 mM). The dashed line indicated the reducing concentrations used for this study.

Figure S2. Far UV spectra of Her-IgG in 50mM Tris-HCl without (blue) and with (red) 0.16 M NaBH<sub>3</sub>CN

Figure S3. Heat map of Her-IgG. Conjugation level of each amine sites obtained by reaction of 5.73  $\mu$ M Her-IgG with 0.29 mM, 0.57 mM, 2.58 mM, 5.73 mM, 11.46 mM, 22.92 mM, and 45.84 mM formaldehyde. The higher affinity for formaldehyde was also evidenced by two conjugated formaldehyde molecules per site (dimethyl labeling) versus only one PEG linker per site.

Table S1. Bottom-up proteomics. (a) AA sequence of Her-IgG and (b) identified sequences and conjugation sites of AD-PEG-N<sub>3</sub> (AD) and NHS-PEG-N<sub>3</sub> (NHS) on Her-IgG by chymotrypsin digestion

Supplementary Method. Experiment for payload linker synthesis and conjugation to Her-IgG-PEG-AD

Figure S1. Effect of reducing agent on the yield of Her-IgG (5.73  $\mu\text{M}$ ) conjugated with 2-(2-(2-(2-Azidoethoxy)ethoxy)ethoxy)acetaldehyde (AD-PEG-N<sub>3</sub>) linker (3.3 mM). The dashed line indicated the reducing concentrations used for this study.

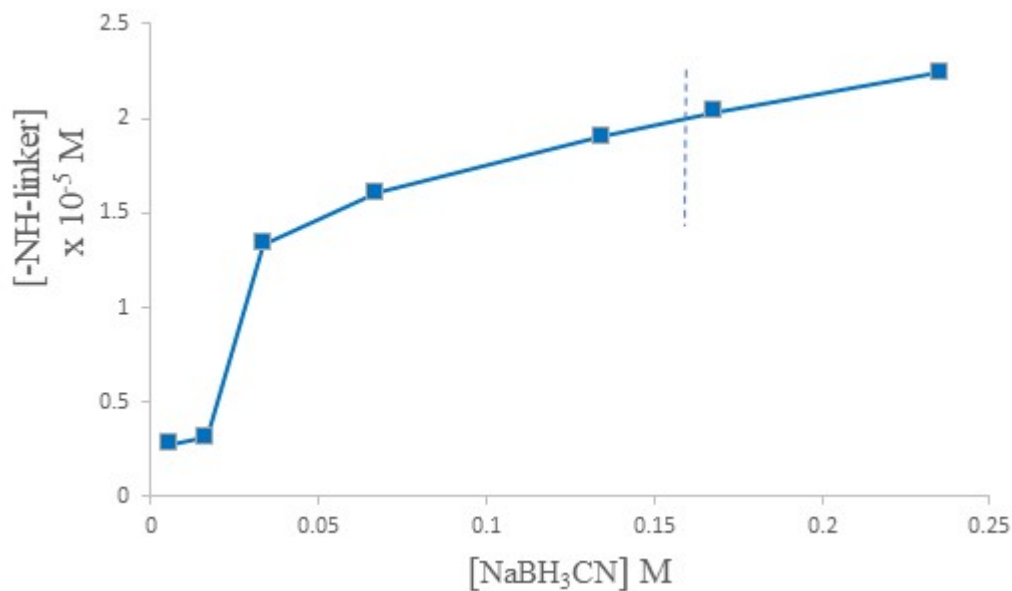

Figure S2. Far UV spectra of Her-IgG in 50mM Tris-HCl without (blue) and with (red) 0.16 M NaBH<sub>3</sub>CN

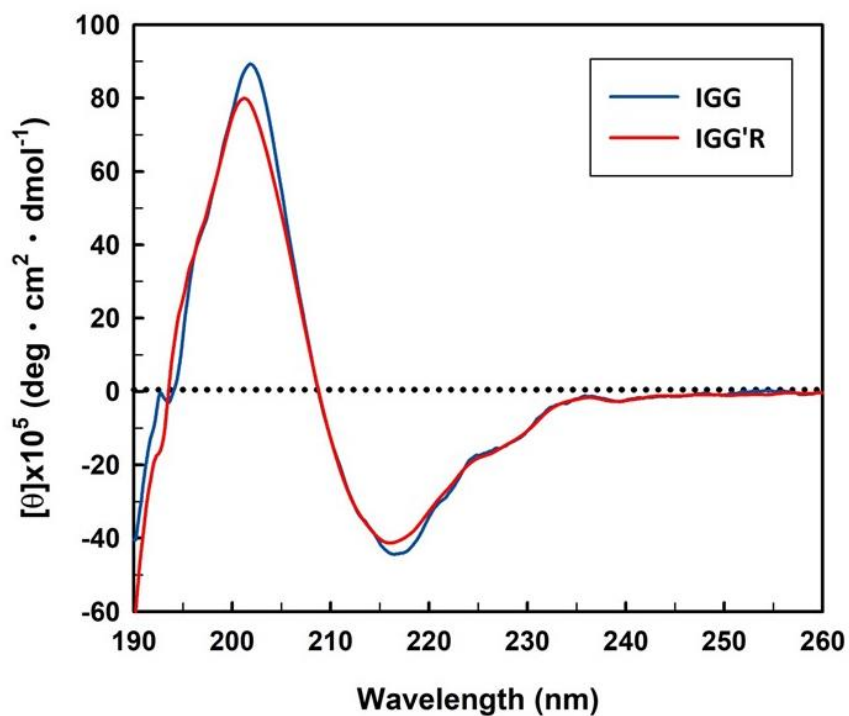

Figure S3. Heat map of Her-IgG. Conjugation level of each amine sites obtained by reaction of 5.73  $\mu$ M Her-IgG with 0.29 mM, 0.57 mM, 2.58 mM, 5.73 mM, 11.46 mM, 22.92 mM, and 45.84 mM formaldehyde.

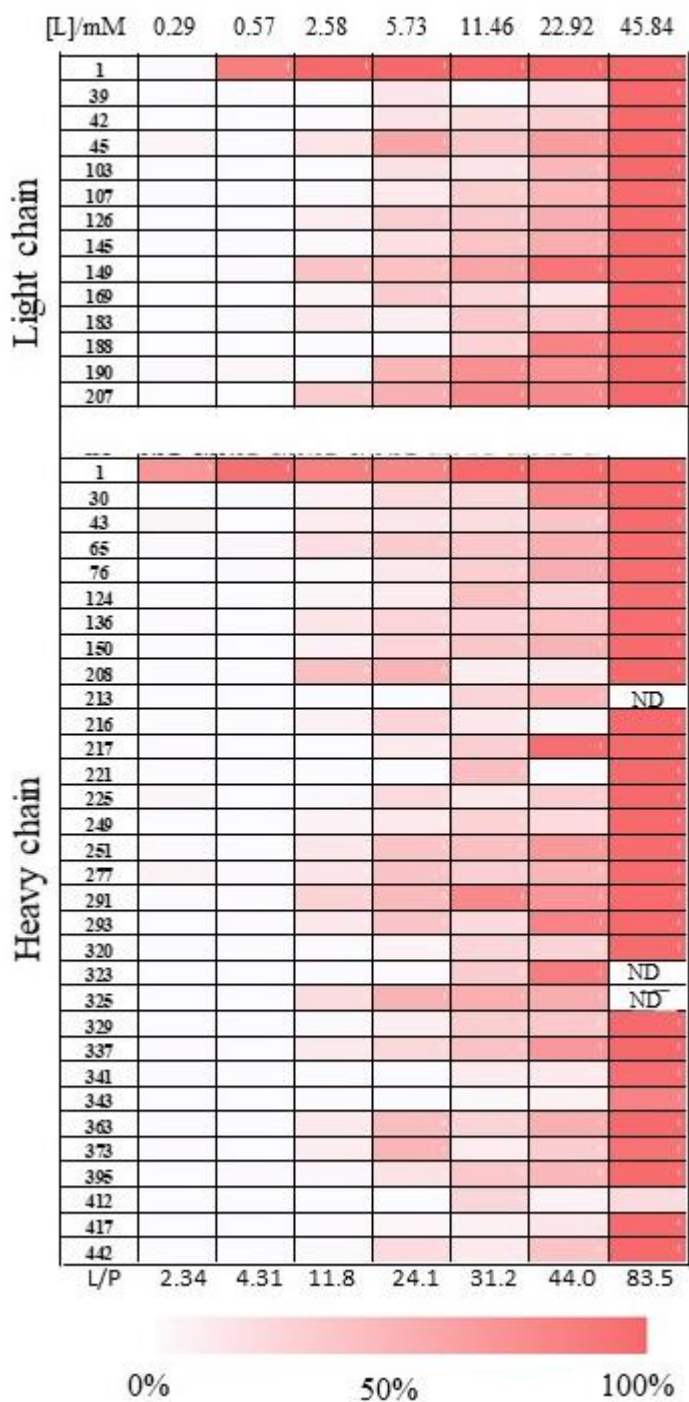

Table S1. Bottom-up proteomics. (a) AA sequence of Her-IgG and (b) identified sequences and conjugation sites of AD-PEG-N<sub>3</sub> (AD) and NHS-PEG-N<sub>3</sub> (NHS) on Her-IgG by chymotrypsin digestion

a.

**Light chain**

1 DIQMTQSPSS LSASVGDRVT ITCRASQDVN TAVAWYQQK  
 41 GKAPKLLIYS ASFLYSGVPS RFSGSRSGTD FTLTISSLQP  
 81 EDFATYYCQQ HYTTPPTFGQ GTKVEIKRTV AAPSVFIFPP  
 121 SDEQLKSGTA SVVCLLNIFY PREAKVQWKV DNALQSGNSQ  
 161 ESVTEQDSKD STYLSSTLT LSKADYEKHK VYACEVTHQG  
 201 LSSPVTKSFN RGEN

**Heavy chain**

1 EVQLVESGGG LVQPGGSLRL SCAASGFNIK DTYIHWVRQA  
 41 PGKGLEWVAR IYPTNGYTRY ADSVKGRFTI SADTSKNTAY  
 81 LQMNSLRAED TAVYYCSRWG GDGFYAMDYW GQGTLVTVSS  
 121 ASTKGPSVFP LAPSSKSTSG GTAALGCLVK DYFPEPVTVS  
 161 WNSGALTSGV HTFPAVLQSS GLYSLSSVVT VPSSSLGTQT  
 201 YICNVNHKPS NTKVDKKVEP KSCDKTHTCP PCPAPELLGG  
 241 PSVFLFPPKP KDTLMISRTP EVTCVVDVVS HEDPEVKFNW  
 281 YVDGVEVHNA KTKPREEQYN STYRVVSVLT VLHQDWLNGK  
 321 EYKCKVSNKA LPAPIEKTIS KAKGQPREPQ VYTLPPSREE  
 361 MTKNQVSLTC LVKGFYPSDI AVEWESNGQP ENNYKTTTPV  
 401 LDSDGSFFLY SKLTVDKSRW QQGNVFSCSV MHEALHNHYT  
 441 QKSLSLSPGK

b.

| light chain_chymotrypsin |     |                                        |                  |       |        |           |           |           |          |   |  |  |  |
|--------------------------|-----|----------------------------------------|------------------|-------|--------|-----------|-----------|-----------|----------|---|--|--|--|
| Start                    | End | Peptide                                | PTM site         | RT    | -10lgP | MWexp(Da) | MWthe(Da) | Error(Da) | m/z      | z |  |  |  |
| 1                        | 9   | DIQMTQSPS                              | free             | 24.53 | 73.06  | 1005.4432 | 1005.4437 | -0.0005   | 503.7289 | 2 |  |  |  |
|                          |     |                                        | D1:AD(1000.00)   | 35.39 | 60.2   | 1206.5552 | 1206.5551 | 1E-04     | 604.2849 | 2 |  |  |  |
| 1                        | 11  | DIQMTQSPSSL                            | free             | 31.75 | 88.34  | 1205.56   | 1205.5598 | 0.0002    | 603.7873 | 2 |  |  |  |
|                          |     |                                        | D1:AD(1000.00)   | 43.61 | 63.2   | 1406.6736 | 1406.6711 | 0.0025    | 704.3441 | 2 |  |  |  |
| 36                       | 45  | YQQKPGKAPK                             | free             | 2.56  | 54.29  | 1143.6406 | 1143.64   | 0.0006    | 572.8276 | 2 |  |  |  |
| 36                       | 47  | YQQKPGKAPKLL                           | free             | 23.15 | 81.55  | 1369.8068 | 1369.8081 | -0.0013   | 685.9107 | 2 |  |  |  |
| 36                       | 49  | YQQKPGKAPKLLIY                         | free             | 29.14 | 38.94  | 1645.9548 | 1645.9555 | -0.0007   | 549.6589 | 3 |  |  |  |
| 37                       | 47  | QQKPGKAPKLL                            | free             | 21.81 | 53.59  | 1206.7446 | 1206.7448 | -0.0002   | 403.2555 | 3 |  |  |  |
| 37                       | 49  | QQKPGKAPKLLIY                          | free             | 28.49 | 66.98  | 1482.8926 | 1482.8922 | 0.0004    | 742.4536 | 2 |  |  |  |
| 93                       | 106 | TIPTTFGQGTKVEI                         | free             | 32.72 | 77.37  | 1474.768  | 1474.7668 | 0.0012    | 738.3913 | 2 |  |  |  |
| 93                       | 107 | TIPTTFGQGTKVEIK                        | free             | 27.64 | 80.87  | 1602.864  | 1602.8617 | 0.0023    | 802.4393 | 2 |  |  |  |
| 99                       | 107 | GQGTKVEIK                              | free             | 15.08 | 46.79  | 958.5438  | 958.5447  | -0.0009   | 480.2792 | 2 |  |  |  |
| 99                       | 108 | GQGTKVEIKR                             | free             | 12.46 | 59.47  | 1114.6466 | 1114.6458 | 0.0008    | 558.3306 | 2 |  |  |  |
| 103                      | 116 | KVEIKRTVAAPSVF                         | free             | 28.79 | 25.04  | 1543.9056 | 1543.9086 | -0.003    | 515.6425 | 3 |  |  |  |
| 104                      | 116 | VEIKRTVAAPSVF                          | free             | 30.78 | 54.5   | 1415.8134 | 1415.8136 | -0.0002   | 708.914  | 2 |  |  |  |
| 105                      | 116 | EIKRTVAAPSVF                           | free             | 29.52 | 53.8   | 1316.7448 | 1316.7452 | -0.0004   | 659.3797 | 2 |  |  |  |
| 117                      | 130 | IFPPSDEQLKSGTASV                       | free             | 28.51 | 64.11  | 1488.7468 | 1488.746  | 0.0008    | 745.3807 | 2 |  |  |  |
| 117                      | 133 | IFPPSDEQLKSGTASVV                      | free             | 41.73 | 48.09  | 1773.9174 | 1773.9149 | 0.0025    | 887.966  | 2 |  |  |  |
|                          |     |                                        | K126:AD(1000.00) | 36.83 | 33.59  | 1975.0378 | 1975.0262 | 0.0116    | 988.5262 | 2 |  |  |  |
| 117                      | 134 | IFPPSDEQLKSGTASVVC(+57.02)             | free             | 32.1  | 63.1   | 1933.944  | 1933.9455 | -0.0015   | 645.6553 | 3 |  |  |  |
| 117                      | 135 | IFPPSDEQLKSGTASVVVC(+57.02)LL          | free             | 36.91 | 76.1   | 2047.0296 | 2047.0296 | 0         | 683.3505 | 3 |  |  |  |
| 117                      | 136 | IFPPSDEQLKSGTASVVC(+57.02)LL           | free             | 41.39 | 66.39  | 2160.1194 | 2160.1137 | 0.0057    | 1081.067 | 2 |  |  |  |
| 126                      | 133 | KSGTASVV                               | free             | 15.85 | 26.58  | 747.4126  | 747.4127  | -1E-04    | 374.7136 | 2 |  |  |  |
|                          |     |                                        | K126:AD(1000.00) | 26.88 | 34.94  | 948.524   | 948.524   | 0         | 475.2693 | 2 |  |  |  |
| 126                      | 134 | KSGTASVVC                              | free             | 15.65 | 57.42  | 907.4432  | 907.4433  | -1E-04    | 454.7289 | 2 |  |  |  |
|                          |     |                                        | K126:AD(1000.00) | 25.64 | 52.59  | 1108.5548 | 1108.5547 | 0.0001    | 555.2847 | 2 |  |  |  |
| 126                      | 135 | TKGPSVFPL                              | free             | 28.9  | 55.45  | 1020.527  | 1020.5274 | -0.0004   | 511.2708 | 2 |  |  |  |
| 126                      | 136 | KSGTASVVC(+57.02)LL                    | free             | 35.56 | 54.37  | 1133.6112 | 1133.6115 | -0.0003   | 567.8129 | 2 |  |  |  |
|                          |     |                                        | K126:AD(1000.00) | 39.29 | 40.65  | 1334.7234 | 1334.7228 | 0.0006    | 668.369  | 2 |  |  |  |
| 136                      | 145 | LN(+.98)NFFYPREAK                      | free             | 24.78 | 33.18  | 1251.6234 | 1251.6247 | -0.0013   | 418.2151 | 3 |  |  |  |
| 136                      | 145 | LNNFFYPREAK                            | free             | 23.72 | 82.18  | 1250.6408 | 1250.6407 | 0.0001    | 626.3277 | 2 |  |  |  |
| 137                      | 145 | N(+.98)NFFYPREAK                       | free             | 22.62 | 67.33  | 1138.5398 | 1138.5407 | -0.0009   | 570.2772 | 2 |  |  |  |
| 137                      | 148 | NFFYPREAKVQW                           | free             | 31.03 | 96.05  | 1550.7638 | 1550.763  | 0.0008    | 776.3892 | 2 |  |  |  |
|                          |     |                                        | K145:AD(1000.00) | 34.52 | 36.94  | 1751.8734 | 1751.8743 | -0.0009   | 584.9651 | 3 |  |  |  |
| 138                      | 148 | NFFYPREAKVQW                           | free             | 31.09 | 55.07  | 1436.7196 | 1436.7201 | -0.0005   | 719.3671 | 2 |  |  |  |
| 140                      | 148 | YPREAKVQW                              | free             | 26.63 | 27.21  | 1175.6085 | 1175.6087 | -0.0002   | 392.8768 | 3 |  |  |  |
| 143                      | 148 | EAKVQW                                 | free             | 25.95 | 23.44  | 759.3904  | 759.3915  | -0.0011   | 380.7025 | 2 |  |  |  |
| 149                      | 155 | KVDNALQ                                | free             | 15.01 | 45.18  | 786.4234  | 786.4236  | -0.0002   | 394.219  | 2 |  |  |  |
| 149                      | 170 | KVDNALQSGNSQESVTEQDSKD                 | free             | 21.5  | 100.91 | 2378.0892 | 2378.0833 | 0.0059    | 793.7037 | 3 |  |  |  |
| 153                      | 173 | ALQSGNSQESVTEQDSKDY                    | free             | 23.24 | 112.72 | 2272.9954 | 2272.9931 | 0.0023    | 1137.505 | 2 |  |  |  |
| 155                      | 173 | QSGNSQESVTEQDSKDY                      | free             | 20.96 | 116.15 | 2088.8774 | 2088.872  | 0.0054    | 1045.446 | 2 |  |  |  |
| 156                      | 173 | SGNSQESVTEQDSKDY                       | free             | 20.83 | 101.96 | 1960.8188 | 1960.8134 | 0.0054    | 981.4167 | 2 |  |  |  |
|                          |     |                                        | K169:AD(1000.00) | 26.8  | 99.17  | 2161.9294 | 2161.9247 | 0.0047    | 1081.972 | 2 |  |  |  |
| 159                      | 173 | SQESVTEQDSKDY                          | free             | 20.74 | 56.21  | 1702.723  | 1702.717  | 0.006     | 852.3688 | 2 |  |  |  |
| 180                      | 186 | TLSKADY                                | free             | 19.18 | 47.16  | 796.3958  | 796.3967  | -0.0009   | 399.2052 | 2 |  |  |  |
|                          |     |                                        | K183:AD(1000.00) | 28.14 | 53.05  | 997.5058  | 997.508   | -0.0022   | 499.7602 | 2 |  |  |  |
| 180                      | 189 | TLSKADYEHK                             | free             | 11.67 | 34.13  | 1190.5929 | 1190.5931 | -0.0002   | 397.8716 | 3 |  |  |  |
|                          |     |                                        | K183:AD(39.44)   | 22.81 | 18.2   | 1391.7038 | 1391.7045 | -0.0007   | 696.8592 | 2 |  |  |  |
| 180                      | 192 | TLSKADYEHKHY                           | free             | 20.09 | 103.99 | 1580.8238 | 1580.8198 | 0.004     | 791.4192 | 2 |  |  |  |
|                          |     |                                        | K183:AD(47.70)   | 24.34 | 82.78  | 1781.9346 | 1781.9312 | 0.0034    | 891.9746 | 2 |  |  |  |
| 182                      | 192 | SKADYEHKHY                             | free             | 16.57 | 36.29  | 1366.686  | 1366.6881 | -0.0021   | 456.5693 | 3 |  |  |  |
|                          |     |                                        | K183:AD(16.28)   | 22.17 | 22.21  | 1567.7985 | 1567.7994 | -0.0009   | 523.6068 | 3 |  |  |  |
| 193                      | 207 | AC(+57.02)EVTHQGLSSPVTK                | free             | 22.78 | 113.55 | 1612.7886 | 1612.7879 | 0.0007    | 807.4016 | 2 |  |  |  |
| 193                      | 209 | AC(+57.02)EVTHQGLSSPVTKSF              | free             | 28.37 | 123.5  | 1846.8916 | 1846.8884 | 0.0032    | 924.4531 | 2 |  |  |  |
| 193                      | 214 | AC(+57.02)EVTHQGLSSPVTKSFNRGEC(+57.02) | free             | 25.91 | 118.66 | 2463.1254 | 2463.1271 | -0.0017   | 822.0491 | 3 |  |  |  |
| 199                      | 209 | QGLSSPVTKSF                            | free             | 29.56 | 91.14  | 1149.603  | 1149.603  | 0         | 575.8088 | 2 |  |  |  |
|                          |     |                                        | K207:AD(1000.00) | 35.21 | 42.98  | 1350.7146 | 1350.7143 | 0.0003    | 676.3646 | 2 |  |  |  |
| 200                      | 209 | GLSSPVTKSF                             | free             | 29.2  | 77.34  | 1021.5438 | 1021.5444 | -0.0006   | 511.7792 | 2 |  |  |  |
| 202                      | 207 | SSPVTK                                 | free             | 10.07 | 30.62  | 617.3388  | 617.3384  | 0.0004    | 309.6767 | 2 |  |  |  |
| 202                      | 209 | SSPVTKSF                               | free             | 23.06 | 64.4   | 851.439   | 851.4389  | 0.0001    | 426.7268 | 2 |  |  |  |
|                          |     |                                        | K207:AD(1000.00) | 31.5  | 60.93  | 1052.5518 | 1052.5502 | 0.0016    | 527.2832 | 2 |  |  |  |
| 202                      | 214 | SSPVTKSFN(+.98)RGEC(+57.02)            | free             | 20.91 | 87.36  | 1468.6634 | 1468.6616 | 0.0018    | 735.339  | 2 |  |  |  |
| 138                      | 148 | NFFYPREAKVQW                           | free             | 31.09 | 55.07  | 1436.7196 | 1436.7201 | -0.0005   | 719.3671 | 2 |  |  |  |
| 140                      | 148 | YPREAKVQW                              | free             | 26.63 | 27.21  | 1175.6085 | 1175.6087 | -0.0002   | 392.8768 | 3 |  |  |  |
| 143                      | 148 | EAKVQW                                 | free             | 25.95 | 23.44  | 759.3904  | 759.3915  | -0.0011   | 380.7025 | 2 |  |  |  |
| 149                      | 155 | KVDNALQ                                | free             | 15.01 | 45.18  | 786.4234  | 786.4236  | -0.0002   | 394.219  | 2 |  |  |  |
| 149                      | 170 | KVDNALQSGNSQESVTEQDSKD                 | free             | 21.5  | 100.91 | 2378.0892 | 2378.0833 | 0.0059    | 793.7037 | 3 |  |  |  |
| 153                      | 173 | ALQSGNSQESVTEQDSKDY                    | free             | 23.24 | 112.72 | 2272.9954 | 2272.9931 | 0.0023    | 1137.505 | 2 |  |  |  |
| 155                      | 173 | QSGNSQESVTEQDSKDY                      | free             | 20.96 | 116.15 | 2088.8774 | 2088.872  | 0.0054    | 1045.446 | 2 |  |  |  |
| 156                      | 173 | SGNSQESVTEQDSKDY                       | free             | 20.83 | 101.96 | 1960.8188 | 1960.8134 | 0.0054    | 981.4167 | 2 |  |  |  |
|                          |     |                                        | K169:AD(1000.00) | 26.8  | 99.17  | 2161.9294 | 2161.9247 | 0.0047    | 1081.972 | 2 |  |  |  |
| 159                      | 173 | SQESVTEQDSKDY                          | free             | 20.74 | 56.21  | 1702.723  | 1702.717  | 0.006     | 852.3688 | 2 |  |  |  |
| 180                      | 186 | TLSKADY                                | free             | 19.18 | 47.16  | 796.3958  | 796.3967  | -0.0009   | 399.2052 | 2 |  |  |  |
|                          |     |                                        | K183:AD(1000.00) | 28.14 | 53.05  | 997.5058  | 997.508   | -0.0022   | 499.7602 | 2 |  |  |  |
| 180                      | 189 | TLSKADYEHK                             | free             | 11.67 | 34.13  | 1190.5929 | 1190.5931 | -0.0002   | 397.8716 | 3 |  |  |  |
|                          |     |                                        | K183:AD(39.44)   | 22.81 | 18.2   | 1391.7038 | 1391.7045 | -0.0007   | 696.8592 | 2 |  |  |  |
| 180                      | 192 | TLSKADYEHKHY                           | free             | 20.09 | 103.99 | 1580.8238 | 1580.8198 | 0.004     | 791.4192 | 2 |  |  |  |
|                          |     |                                        | K183:AD(47.70)   | 24.34 | 82.78  | 1781.9346 | 1781.9312 | 0.0034    | 891.9746 | 2 |  |  |  |
| 182                      | 192 | SKADYEHKHY                             | free             | 16.57 | 36.29  | 1366.686  | 1366.6881 | -0.0021   | 456.5693 | 3 |  |  |  |
|                          |     |                                        | K183:AD(16.28)   | 22.17 | 22.21  | 1567.7985 | 1567.7994 | -0.0009   | 523.6068 | 3 |  |  |  |
| 193                      | 207 | AC(+57.02)EVTHQGLSSPVTK                | free             | 22.78 | 113.55 | 1612.7886 | 1612.7879 | 0.0007    | 807.4016 | 2 |  |  |  |
| 193                      | 209 | AC(+57.02)EVTHQGLSSPVTKSF              | free             | 28.37 | 123.5  | 1846.8916 | 1846.8884 | 0.0032    | 924.4531 | 2 |  |  |  |
| 193                      | 214 | AC(+57.02)EVTHQGLSSPVTKSFNRGEC(+57.02) | free             | 25.91 | 118.66 | 2463.1254 | 2463.1271 | -0.0017   | 822.0491 | 3 |  |  |  |
| 199                      | 209 | QGLSSPVTKSF                            | free             | 29.56 | 91.14  | 1149.603  | 1149.603  | 0         | 575.8088 | 2 |  |  |  |
|                          |     |                                        | K207:AD(1000.00) | 35.21 | 42.98  | 1350.7146 | 1350.7143 | 0.0003    | 676.3646 | 2 |  |  |  |
| 200                      | 209 | GLSSPVTKSF                             | free             |       |        |           |           |           |          |   |  |  |  |

|     |     |                                |                               |       |        |           |           |         |          |   |
|-----|-----|--------------------------------|-------------------------------|-------|--------|-----------|-----------|---------|----------|---|
| 1   | 20  | EVQLVESGGGLVQPGGSLRL           | free                          | 38.62 | 127.12 | 1994.084  | 1994.0797 | 0.0043  | 998.0493 | 2 |
| 21  | 33  | SC(+57.02)AASGFNIKDTY          | E1:AD(1000.00)                | 42.68 | 101.53 | 2195.1906 | 2195.191  | -0.0004 | 732.7375 | 3 |
| 26  | 33  | GFNIKDTY                       | free                          | 35.63 | 32.63  | 1432.622  | 1432.6293 | -0.0073 | 717.3183 | 2 |
| 28  | 33  | NIKDTY                         | free                          | 29.43 | 66.53  | 956.4586  | 956.4603  | -0.0017 | 479.2366 | 2 |
| 28  | 33  | NIKDTY                         | N28:Deamidation (NQ)(1000.00) | 22.6  | 37.07  | 753.355   | 753.3545  | 0.0005  | 377.6848 | 2 |
| 28  | 33  | NIKDTY                         | free                          | 18.72 | 37.6   | 752.3706  | 752.3705  | 0.0001  | 377.1926 | 2 |
| 28  | 33  | NIKDTY                         | K30:AD(1000.00)               | 27.9  | 38.84  | 953.4788  | 953.4818  | -0.003  | 477.7467 | 2 |
| 28  | 36  | NIKDTYIHW                      | free                          | 32.22 | 87.26  | 1188.5961 | 1188.5927 | 0.0034  | 397.206  | 3 |
| 29  | 33  | IKDTY                          | K30:AD(1000.00)               | 36.67 | 21.09  | 1389.7035 | 1389.7041 | -0.0006 | 464.2418 | 3 |
| 29  | 33  | IKDTY                          | free                          | 16.3  | 18.74  | 638.3278  | 638.3275  | 0.0003  | 320.1712 | 2 |
| 37  | 47  | VRQAPGKGLEW                    | free                          | 27.23 | 40.33  | 1239.6726 | 1239.6724 | 0.0002  | 620.8436 | 2 |
| 39  | 47  | QAPGKGLEW                      | K43:AD(1000.00)               | 33.31 | 91.21  | 1440.7816 | 1440.7837 | -0.0021 | 721.3981 | 2 |
| 43  | 47  | KGLEW                          | free                          | 30.1  | 80.96  | 984.5026  | 984.5029  | -0.0003 | 493.2586 | 2 |
| 43  | 47  | KGLEW                          | free                          | 29.68 | 27.61  | 631.3328  | 631.3329  | -1E-04  | 316.6737 | 2 |
| 58  | 68  | TRYADSVKGRF                    | free                          | 22.3  | 90.61  | 1298.675  | 1298.6731 | 0.0019  | 650.3448 | 2 |
| 60  | 68  | YADSVKGRF                      | free                          | 22.51 | 22.12  | 1041.524  | 1041.5243 | -0.0003 | 521.7693 | 2 |
| 61  | 68  | ADSVKGRF                       | free                          | 18.08 | 64.99  | 878.4606  | 878.461   | -0.0004 | 440.2376 | 2 |
| 61  | 68  | ADSVKGRF                       | K65:AD(1000.00)               | 26.66 | 29.06  | 1079.5737 | 1079.5724 | 0.0013  | 360.8652 | 3 |
| 69  | 80  | TISADTSKNTAY                   | N77:Deamidation (NQ)(1000.00) | 22.01 | 58.34  | 1271.5982 | 1271.5881 | 0.0101  | 636.8064 | 2 |
| 69  | 80  | TISADTSKNTAY                   | free                          | 21.7  | 58.34  | 1270.605  | 1270.6041 | 0.0009  | 636.3098 | 2 |
| 69  | 80  | TISADTSKNTAY                   | K76:AD(1000.00)               | 28.02 | 84.02  | 1471.7124 | 1471.7154 | -0.003  | 736.8635 | 2 |
| 69  | 81  | TISADTSKNTAYL                  | free                          | 27.89 | 89.73  | 1383.6874 | 1383.6882 | -0.0008 | 692.851  | 2 |
| 69  | 81  | TISADTSKNTAYL                  | K76:AD(1000.00)               | 33.41 | 58.33  | 1584.8008 | 1584.7995 | 0.0013  | 793.4077 | 2 |
| 69  | 84  | TISADTSKNTAYLQMN               | free                          | 29.05 | 72.14  | 1756.834  | 1756.8301 | 0.0039  | 879.4243 | 2 |
| 70  | 80  | ISADTSKNTAY                    | free                          | 20.26 | 84.8   | 1169.556  | 1169.5564 | -0.0004 | 585.7853 | 2 |
| 71  | 80  | SADTSKNTAY                     | free                          | 11.34 | 50.36  | 1056.4722 | 1056.4724 | -0.0002 | 529.2434 | 2 |
| 111 | 124 | QGTLTVVSSASTK                  | free                          | 24.67 | 115.56 | 1334.7044 | 1334.7042 | 0.0002  | 668.3595 | 2 |
| 116 | 127 | VTVSSASTKGPS                   | free                          | 18.71 | 68.21  | 1119.5772 | 1119.5772 | 0       | 560.7959 | 2 |
| 116 | 129 | VTVSSASTKGPSVF                 | free                          | 29.71 | 103.5  | 1365.7136 | 1365.714  | -0.0004 | 683.8641 | 2 |
| 116 | 131 | VTVSSASTKGPSVFPL               | free                          | 36.58 | 107.11 | 1575.8504 | 1575.8508 | -0.0004 | 788.9325 | 2 |
| 116 | 136 | VTVSSASTKGPSVFPLAPSSK          | free                          | 31.83 | 117.85 | 2046.099  | 2046.0997 | -0.0007 | 683.0403 | 3 |
| 116 | 145 | VTVSSASTKGPSVFPLAPSSKSTSGGTAAL | free                          | 34.2  | 78.76  | 2791.467  | 2791.4604 | 0.0066  | 931.4963 | 3 |
| 117 | 131 | TVSSASTKGPSVFPL                | free                          | 35.82 | 99.24  | 1476.7826 | 1476.7824 | 0.0002  | 739.3986 | 2 |
| 118 | 131 | VSSASTKGPSVFPL                 | free                          | 35.63 | 116.45 | 1375.734  | 1375.7347 | -0.0007 | 688.8743 | 2 |
| 118 | 131 | VSSASTKGPSVFPL                 | K124:AD(1000.00)              | 36.65 | 30.46  | 1576.8532 | 1576.8461 | 0.0071  | 789.4339 | 2 |
| 118 | 134 | VSSASTKGPSVFPLAPS              | free                          | 34.55 | 81.1   | 1630.8582 | 1630.8566 | 0.0016  | 816.4364 | 2 |
| 119 | 129 | SSASTKGPSVF                    | free                          | 26.43 | 89.46  | 1066.5284 | 1066.5295 | -0.0011 | 534.2715 | 2 |
| 119 | 131 | SSASTKGPSVFPL                  | free                          | 35.29 | 78.85  | 1276.6664 | 1276.6663 | 1E-04   | 639.3405 | 2 |
| 119 | 134 | SSASTKGPSVFPLAPS               | free                          | 34.27 | 86.97  | 1531.7898 | 1531.7882 | 0.0016  | 766.9022 | 2 |
| 120 | 129 | SASTKGPSVF                     | free                          | 26.32 | 86.69  | 979.4964  | 979.4975  | -0.0011 | 490.7555 | 2 |
| 120 | 131 | SASTKGPSVFPL                   | free                          | 35.32 | 82.89  | 1189.635  | 1189.6343 | 0.0007  | 595.8248 | 2 |
| 120 | 131 | SASTKGPSVFPL                   | K124:AD(1000.00)              | 40    | 42.08  | 1390.748  | 1390.7456 | 0.0024  | 696.3813 | 2 |
| 120 | 134 | SASTKGPSVFPLAPS                | free                          | 34.35 | 16.7   | 1444.7572 | 1444.7562 | 0.001   | 723.3859 | 2 |
| 120 | 136 | SASTKGPSVFPLAPSSK              | free                          | 30.24 | 119.28 | 1659.8854 | 1659.8832 | 0.0022  | 830.95   | 2 |
| 120 | 145 | SASTKGPSVFPLAPSSKSTSGGTAAL     | free                          | 33.21 | 96.08  | 2405.2467 | 2405.2438 | 0.0029  | 802.7562 | 3 |
| 122 | 129 | STKGPSVF                       | free                          | 25.88 | 60.27  | 821.4276  | 821.4283  | -0.0007 | 411.7211 | 2 |
| 122 | 131 | STKGPSVFPL                     | free                          | 35.46 | 70.73  | 1031.5646 | 1031.5652 | -0.0006 | 516.7896 | 2 |
| 122 | 134 | STKGPSVFPLAPS                  | free                          | 34.49 | 72.9   | 1286.6874 | 1286.6871 | 0.0003  | 644.351  | 2 |
| 122 | 145 | STKGPSVFPLAPSSKSTSGGTAAL       | free                          | 33.21 | 96.08  | 2247.1743 | 2247.1747 | -0.0004 | 750.0654 | 3 |
| 123 | 134 | TKGPSVFPLAPS                   | free                          | 34.66 | 74.57  | 1199.655  | 1199.655  | 0       | 600.8348 | 2 |
| 123 | 136 | TKGPSVFPLAPSSK                 | free                          | 30.3  | 98.37  | 1414.7822 | 1414.782  | 0.0002  | 708.3984 | 2 |
| 124 | 131 | KGPSVFPL                       | free                          | 35.44 | 67.75  | 843.4856  | 843.4854  | 0.0002  | 422.7501 | 2 |
| 124 | 131 | KGPSVFPL                       | K124:AD(1000.00)              | 40.14 | 30.44  | 1044.5962 | 1044.5968 | -0.0006 | 523.3054 | 2 |
| 124 | 134 | KGPSVFPLAPS                    | free                          | 34.63 | 59.98  | 1098.6062 | 1098.6073 | -0.0011 | 550.3104 | 2 |
| 124 | 138 | KGPSVFPLAPSSKST                | free                          | 30.24 | 79.11  | 1501.8072 | 1501.814  | -0.0068 | 751.9109 | 2 |
| 124 | 145 | KGPSVFPLAPSSKSTSGGTAAL         | free                          | 33.17 | 134.21 | 2059.0974 | 2059.095  | 0.0024  | 1030.556 | 2 |
| 116 | 136 | VTVSSASTKGPSVFPLAPSSK          | free                          | 31.83 | 117.85 | 2046.099  | 2046.0997 | -0.0007 | 683.0403 | 3 |
| 116 | 145 | VTVSSASTKGPSVFPLAPSSKSTSGGTAAL | free                          | 34.2  | 78.76  | 2791.467  | 2791.4604 | 0.0066  | 931.4963 | 3 |
| 120 | 136 | SASTKGPSVFPLAPSSK              | free                          | 30.24 | 119.28 | 1659.8854 | 1659.8832 | 0.0022  | 830.95   | 2 |
| 120 | 145 | SASTKGPSVFPLAPSSKSTSGGTAAL     | free                          | 33.21 | 96.08  | 2405.2467 | 2405.2438 | 0.0029  | 802.7562 | 3 |
| 122 | 145 | STKGPSVFPLAPSSKSTSGGTAAL       | free                          | 33.21 | 96.08  | 2247.1743 | 2247.1747 | -0.0004 | 750.0654 | 3 |
| 125 | 136 | GPSVFPLAPSSK                   | free                          | 33.14 | 73.75  | 1185.6422 | 1185.6394 | 0.0028  | 593.8284 | 2 |
| 124 | 138 | KGPSVFPLAPSSKST                | free                          | 30.24 | 79.11  | 1501.8072 | 1501.814  | -0.0068 | 751.9109 | 2 |
| 124 | 145 | KGPSVFPLAPSSKSTSGGTAAL         | free                          | 33.17 | 134.21 | 2059.0974 | 2059.095  | 0.0024  | 1030.556 | 2 |
| 125 | 138 | GPSVFPLAPSSKST                 | free                          | 32.93 | 82.75  | 1373.7164 | 1373.7191 | -0.0027 | 687.8655 | 2 |
| 125 | 145 | GPSVFPLAPSSKSTSGGTAAL          | free                          | 36.2  | 89.13  | 1931      | 1931      | 0       | 966.5073 | 2 |
| 128 | 138 | VFPLAPSSKST                    | free                          | 29.64 | 64.59  | 1132.6118 | 1132.6128 | -0.001  | 567.3132 | 2 |
| 128 | 145 | VFPLAPSSKSTSGGTAAL             | free                          | 33.99 | 93.73  | 1689.894  | 1689.8938 | 0.0002  | 845.9543 | 2 |
| 130 | 145 | PLAPSSKSTSGGTAAL               | free                          | 25.36 | 102.22 | 1443.7572 | 1443.7569 | 0.0003  | 722.8859 | 2 |
| 132 | 145 | APSSKSTSGGTAAL                 | free                          | 20.19 | 90.37  | 1233.6196 | 1233.6201 | -0.0005 | 617.8171 | 2 |
| 132 | 145 | APSSKSTSGGTAAL                 | K136:AD(1000.00)              | 27.26 | 53.72  | 1434.7334 | 1434.7314 | 0.002   | 718.374  | 2 |
| 134 | 145 | SSKSTSGGTAAL                   | free                          | 17.93 | 74.06  | 1065.5292 | 1065.5302 | -0.001  | 533.7719 | 2 |

|     |     |                                                   |                  |       |        |           |           |         |          |   |
|-----|-----|---------------------------------------------------|------------------|-------|--------|-----------|-----------|---------|----------|---|
| 135 | 145 | SKSTS GGTAAL                                      | free             | 17.7  | 68.56  | 978.4976  | 978.4982  | -0.0006 | 490.2561 | 2 |
|     |     |                                                   | K136:AD(1000.00) | 23.26 | 30.44  | 1179.6102 | 1179.6095 | 0.0007  | 590.8124 | 2 |
| 146 | 152 | GC(+57.02)LVKDY                                   | free             | 24.21 | 53.36  | 853.4034  | 853.4004  | 0.003   | 427.709  | 2 |
| 146 | 157 | GC(+57.02)LVKDYFPEPV                              | free             | 36.64 | 60.38  | 1422.6914 | 1422.6853 | 0.0061  | 712.353  | 2 |
|     |     |                                                   | free             | 38.27 | 88.46  | 1622.8024 | 1622.8015 | -0.0009 | 812.4085 | 2 |
| 146 | 159 | GC(+57.02)LVKDYFPEPVTV                            | free             | 41.72 | 21.44  | 1823.9066 | 1823.9128 | -0.0062 | 912.9606 | 2 |
|     |     |                                                   | K150:AD(1000.00) | 41.72 | 21.44  | 1823.9066 | 1823.9128 | -0.0062 | 912.9606 | 2 |
| 146 | 161 | GC(+57.02)LVKDYFPEPVTVSW                          | free             | 42.12 | 112.97 | 1895.9144 | 1895.9128 | 0.0016  | 948.9645 | 2 |
| 149 | 159 | VKDYFPEPVTV                                       | free             | 35.21 | 94.52  | 1292.665  | 1292.6653 | -0.0003 | 647.3398 | 2 |
| 149 | 161 | VKDYFPEPVTVSW                                     | free             | 40.13 | 57.41  | 1565.781  | 1565.7766 | 0.0044  | 783.8978 | 2 |
|     |     |                                                   | free             | 10.67 | 57.24  | 1282.6098 | 1283.5928 | -0.983  | 642.3122 | 2 |
| 202 | 212 | IC(+57.02)NVNHNKPSNT                              | free             | 21.69 | 41.75  | 1483.7206 | 1483.7202 | 0.0004  | 742.8676 | 2 |
|     |     |                                                   | K208:AD(1000.00) | 21.69 | 41.75  | 1483.7206 | 1483.7202 | 0.0004  | 742.8676 | 2 |
| 207 | 212 | HKPSNT                                            | free             | 2.46  | 37.6   | 682.3402  | 682.3398  | 0.0004  | 342.1774 | 2 |
| 213 | 221 | KVDKKEPEK                                         | free             | 2.43  | 43.06  | 1069.65   | 1069.6495 | 0.0005  | 357.5573 | 3 |
| 213 | 227 | KVDKKEPEKSC(+57.02)DKTH                           | free             | 8.73  | 87.33  | 1797.9411 | 1797.9407 | 0.0004  | 600.321  | 3 |
| 213 | 238 | KVDKKEPEKSC(+57.02)DKTHC(+57.02)PPC(+57.02)PAPELL | free             | 25.66 | 57.16  | 3033.5151 | 3033.5086 | 0.0065  | 1012.179 | 3 |
| 213 | 227 | KVDKKEPEKSC(+57.02)DKTH                           | free             | 8.73  | 87.33  | 1797.9411 | 1797.9407 | 0.0004  | 600.321  | 3 |
| 213 | 238 | KVDKKEPEKSC(+57.02)DKTHC(+57.02)PPC(+57.02)PAPELL | free             | 25.66 | 57.16  | 3033.5151 | 3033.5086 | 0.0065  | 1012.179 | 3 |
| 222 | 227 | SC(+57.02)DKTH                                    | free             | 2.54  | 75.71  | 746.3016  | 746.3017  | -1E-04  | 374.1581 | 2 |
| 222 | 238 | SC(+57.02)DK(+201.11)THC(+57.02)PPC(+57.02)PAPELL | free             | 33.83 | 45.61  | 2182.9821 | 2182.981  | 0.0011  | 728.668  | 3 |
| 222 | 238 | SC(+57.02)DKTHC(+57.02)PPC(+57.02)PAPELL          | free             | 30.74 | 80.06  | 1981.8766 | 1981.8696 | 0.007   | 991.9456 | 2 |
| 222 | 244 | SC(+57.02)DKTHC(+57.02)PPC(+57.02)PAPELLGGPSVF    | free             | 37.45 | 112.41 | 2526.1394 | 2526.1342 | 0.0052  | 1264.077 | 2 |
| 224 | 238 | DKTHC(+57.02)PPC(+57.02)PAPELL                    | free             | 31.6  | 112.85 | 1734.8074 | 1734.8069 | 0.0005  | 868.411  | 2 |
| 224 | 244 | DKTHC(+57.02)PPC(+57.02)PAPELLGGPSVF              | free             | 38.29 | 97.32  | 2279.0734 | 2279.0715 | 0.0019  | 1140.544 | 2 |
| 245 | 254 | LFPPKPKDIL                                        | free             | 28.12 | 25.97  | 1154.6697 | 1154.6699 | -0.0002 | 385.8972 | 3 |
| 245 | 255 | LFPPKPKDILM                                       | free             | 30.16 | 54.09  | 1285.7118 | 1285.7104 | 0.0014  | 643.8632 | 2 |
| 245 | 254 | LFPPKPKDIL                                        | free             | 28.12 | 25.97  | 1154.6697 | 1154.6699 | -0.0002 | 385.8972 | 3 |
| 245 | 255 | LFPPKPKDILM                                       | free             | 30.16 | 54.09  | 1285.7118 | 1285.7104 | 0.0014  | 643.8632 | 2 |
| 255 | 278 | MISRTPEVTC(+57.02)VVDVSHEDPEVKF                   | free             | 36.74 | 64.33  | 2772.3452 | 2772.3463 | -0.0011 | 694.0936 | 4 |
| 256 | 278 | ISRTPEVTC(+57.02)VVDVSHEDPEVKF                    | free             | 35.95 | 111.88 | 2641.3114 | 2641.3058 | 0.0056  | 1321.663 | 2 |
| 264 | 278 | C(+57.02)VVDVSHEDPEVKF                            | free             | 32.82 | 115.13 | 1757.8338 | 1757.8295 | 0.0043  | 879.9242 | 2 |
| 265 | 278 | VVDVSHEDPEVKF                                     | free             | 31.91 | 123.95 | 1597.8004 | 1597.7988 | 0.0016  | 799.9075 | 2 |
| 266 | 278 | VVDVSHEDPEVKF                                     | free             | 29.84 | 29.95  | 1498.7283 | 1498.7304 | -0.0021 | 500.5834 | 3 |
| 282 | 299 | VDGVEVHN(+.98)AKTKPREEQY                          | free             | 21.53 | 90.27  | 2099.0271 | 2099.0283 | -0.0012 | 700.683  | 3 |
| 282 | 299 | VDGVEVHNAKTKPREEQY                                | free             | 19.41 | 93.12  | 2098.0458 | 2098.0443 | 0.0015  | 700.3559 | 3 |
| 282 | 303 | VDGVEVHNAKTKPREEQYN(+.98)STY                      | free             | 21.62 | 74.17  | 2564.2161 | 2564.2143 | 0.0018  | 855.746  | 3 |
| 289 | 299 | NAKTKPREEQY                                       | free             | 9.02  | 70.3   | 1362.6902 | 1362.6891 | 0.0011  | 682.3524 | 2 |

|     |     |                               |                                    |       |        |           |           |         |          |   |
|-----|-----|-------------------------------|------------------------------------|-------|--------|-----------|-----------|---------|----------|---|
| 290 | 303 | AKTKPREEQYN(+.98)STY          | free                               | 17.29 | 56.89  | 1714.8194 | 1714.8162 | 0.0032  | 858.417  | 2 |
| 289 | 303 | NAKTKPREEQYNSTY               | free                               | 17.62 | 21.56  | 1828.857  | 1829.8431 | -0.9861 | 610.6263 | 3 |
|     |     |                               | K291:AD(33.18)                     | 22.36 | 45.77  | 2029.9794 | 2029.9704 | 0.009   | 1015.997 | 2 |
| 282 | 299 | VDGVEVHN(+.98)AKTKPREEQY      | free                               | 21.53 | 90.27  | 2099.0271 | 2099.0283 | -0.0012 | 700.683  | 3 |
| 282 | 299 | VDGVEVHNAKTKPREEQY            | free                               | 19.41 | 93.12  | 2098.0458 | 2098.0443 | 0.0015  | 700.3559 | 3 |
| 282 | 303 | VDGVEVHNAKTKPREEQYN(+.98)STY  | free                               | 21.62 | 74.17  | 2564.2161 | 2564.2143 | 0.0018  | 855.746  | 3 |
| 289 | 299 | NAKTKPREEQY                   | free                               | 9.02  | 70.3   | 1362.6902 | 1362.6891 | 0.0011  | 682.3524 | 2 |
|     |     |                               | free                               | 17.62 | 21.56  | 1828.857  | 1828.8591 | -0.0021 | 610.6263 | 3 |
| 289 | 303 | NAKTKPREEQYN(+.98)STY         | free                               | 17.29 | 56.89  | 1714.8194 | 1714.8162 | 0.0032  | 858.417  | 2 |
|     |     |                               | K293:AD(33.18)                     | 22.36 | 45.77  | 2029.9794 | 2029.9704 | 0.009   | 1015.997 | 2 |
| 290 | 303 | AKTKPREEQYN(+.98)STY          | free                               | 17.29 | 56.89  | 1714.8194 | 1714.8162 | 0.0032  | 858.417  | 2 |
|     |     |                               | free                               | 19.32 | 70     | 1515.6866 | 1515.6841 | 0.0025  | 758.8506 | 2 |
| 292 | 303 | TKPREEQYN(+.98)STY            | free                               | 24.71 | 34.96  | 1716.7978 | 1716.7955 | 0.0023  | 859.4062 | 2 |
|     |     |                               | K293:AD(1000.00)                   | 42.23 | 102.89 | 1602.7726 | 1602.7678 | 0.0048  | 802.3936 | 2 |
|     |     |                               | free, N318:Deamidation (NQ)(97.65) | 42.23 | 102.89 | 1602.7726 | 1602.7678 | 0.0048  | 802.3936 | 2 |
| 310 | 322 | TVLHQDWLN(+.98)GKEY           | free                               | 31.38 | 111.73 | 1601.7878 | 1601.7838 | 0.004   | 801.9012 | 2 |
|     |     |                               | K320:AD(1000.00)                   | 35.82 | 101.56 | 1803.8812 | 1803.8792 | 0.002   | 902.9479 | 2 |
| 311 | 322 | VLHQDWLN(+.98)GKEY            | free                               | 30.4  | 83.85  | 1501.7206 | 1501.7201 | 0.0005  | 751.8676 | 2 |
|     |     |                               | free                               | 33.47 | 63.13  | 1288.5754 | 1288.5836 | -0.0082 | 645.295  | 2 |
| 313 | 322 | HQDWLNGKEY                    | free                               | 27.25 | 99.33  | 1289.568  | 1289.5676 | 0.0004  | 645.2913 | 2 |
|     |     |                               | N318:Deamidation (NQ):127.66       | 13.4  | 29.72  | 722.3602  | 722.3599  | 0.0003  | 362.1874 | 2 |
| 317 | 322 | LNGKEY                        | free                               | 17.53 | 36.33  | 723.3444  | 723.3439  | 0.0005  | 362.6795 | 2 |
|     |     |                               | N318:Deamidation (NQ):1000.00      | 2.51  | 54.56  | 734.3752  | 734.3745  | 0.0007  | 368.1949 | 2 |
| 323 | 328 | KC(+57.02)KVSN                | free                               | 2.38  | 27.55  | 862.4692  | 862.4695  | -0.0003 | 432.2419 | 2 |
| 323 | 329 | KC(+57.02)KVSNK               | free                               | 22.05 | 17.98  | 1682.9384 | 1682.9389 | -0.0005 | 421.7419 | 4 |
| 323 | 337 | KC(+57.02)KVSN(+.98)KALPAPIEK | free                               | 21.05 | 49.62  | 1681.9536 | 1681.9549 | -0.0013 | 561.6585 | 3 |
| 326 | 337 | VSNKALPAPIEK                  | free                               | 23.86 | 97.88  | 1265.7344 | 1265.7343 | 1E-04   | 633.8745 | 2 |
| 328 | 339 | NKALPAPIEKTI                  | free                               | 28.49 | 80.22  | 1293.7646 | 1293.7656 | -0.001  | 647.8896 | 2 |
| 328 | 340 | NKALPAPIEKTIIS                | free                               | 27.5  | 69.69  | 1380.7966 | 1380.7976 | -0.001  | 691.4056 | 2 |
|     |     |                               | free                               | 22.04 | 73.87  | 965.5906  | 965.5909  | -0.0003 | 483.8026 | 2 |
| 329 | 337 | KALPAPIEK                     | free                               | 28.71 | 52.85  | 1166.7008 | 1166.7023 | -0.0015 | 584.3577 | 2 |
|     |     |                               | K329:AD(68.03)                     | 28.51 | 52.83  | 1179.7218 | 1179.7227 | -0.0009 | 590.8682 | 2 |
| 329 | 339 | KALPAPIEKTI                   | free                               | 28.3  | 84.98  | 1266.7545 | 1266.7547 | -0.0002 | 423.2588 | 3 |
| 329 | 340 | KALPAPIEKTIIS                 | free                               | 24.6  | 86.42  | 1394.8512 | 1394.8497 | 0.0015  | 698.4329 | 2 |
| 329 | 341 | KALPAPIEKTIISK                | free                               | 25.35 | 26.36  | 837.4958  | 837.496   | -0.0002 | 419.7552 | 2 |
| 330 | 337 | ALPAPIEK                      | free                               | 26.3  | 53.37  | 938.5422  | 938.5437  | -0.0015 | 470.2784 | 2 |
| 330 | 338 | ALPAPIEKTI                    | free                               | 32.2  | 80.74  | 1051.6294 | 1051.6277 | 0.0017  | 526.822  | 2 |

|     |     |                                 |                             |       |        |           |           |         |          |   |
|-----|-----|---------------------------------|-----------------------------|-------|--------|-----------|-----------|---------|----------|---|
| 330 | 342 | ALPAPIEK TISKA                  | free                        | 30.48 | 86.51  | 1337.7916 | 1337.7918 | -0.0002 | 669.9031 | 2 |
| 332 | 337 | PAPIEK                          | free                        | 25.41 | 45.27  | 653.3752  | 653.3748  | 0.0004  | 327.6949 | 2 |
| 332 | 338 | PAPIEKT                         | free                        | 26.38 | 51.67  | 754.423   | 754.4225  | 0.0005  | 378.2188 | 2 |
| 338 | 343 | TISKAK                          | free                        | 2.58  | 31.94  | 646.4018  | 646.4014  | 0.0004  | 324.2082 | 2 |
| 338 | 350 | TISKAKGQPREPQ                   | free                        | 9.32  | 17.37  | 1438.788  | 1438.7892 | -0.0012 | 480.6033 | 3 |
| 338 | 352 | TISKAKGQPREPVY                  | free                        | 20.5  | 108.22 | 1700.9244 | 1700.9209 | 0.0035  | 851.4695 | 2 |
|     |     |                                 | K343:AD(8.22)               | 24.65 | 47.5   | 1902.0318 | 1902.0323 | -0.0005 | 635.0179 | 3 |
| 339 | 352 | ISKAKGQPREPVY                   | free                        | 19.94 | 96.09  | 1599.875  | 1599.8733 | 0.0017  | 800.9448 | 2 |
| 340 | 352 | SKAKGQPREPVY                    | free                        | 18.71 | 89.82  | 1486.7912 | 1486.7892 | 0.002   | 744.4029 | 2 |
| 341 | 352 | KAKGQPREPVY                     | free                        | 18.42 | 82.7   | 1399.758  | 1399.7572 | 0.0008  | 700.8863 | 2 |
| 342 | 352 | AKGQPREPVY                      | free                        | 24.89 | 53.37  | 1271.663  | 1271.6622 | 0.0008  | 636.8388 | 2 |
|     |     |                                 | K343:AD(1000.00)            | 25.58 | 44.16  | 1472.7738 | 1472.7736 | 0.0002  | 737.3942 | 2 |
| 343 | 352 | KGQPREPVY                       | free                        | 20.55 | 62.68  | 1200.625  | 1200.6251 | -1E-04  | 601.3198 | 2 |
|     |     |                                 | K343:AD(1000.00)            | 25.26 | 40.58  | 1401.7362 | 1401.7362 | 0       | 701.8754 | 2 |
| 353 | 364 | TLPPSREEMTKN                    | free                        | 20.15 | 53.64  | 1401.693  | 1401.6922 | 0.0008  | 701.8538 | 2 |
| 353 | 368 | TLPPSREEMTKNQVSL                | free                        | 28.21 | 84.85  | 1828.9392 | 1828.9353 | 0.0039  | 915.4769 | 2 |
| 353 | 369 | TLPPSREEMTKNQVSLT               | free                        | 28.65 | 44.96  | 1929.9864 | 1929.983  | 0.0034  | 966.0005 | 2 |
| 362 | 368 | TKNQVSL                         | free                        | 22.1  | 58.17  | 788.4396  | 788.4392  | 0.0004  | 395.2271 | 2 |
|     |     |                                 | K363:AD(1000.00)            | 30.01 | 29.16  | 989.5496  | 989.5506  | -0.001  | 495.7821 | 2 |
| 369 | 375 | TC(+57.02)LVKGF                 | free                        | 29.99 | 83.57  | 823.4258  | 823.4262  | -0.0004 | 412.7202 | 2 |
| 370 | 375 | C(+57.02)LVKGF                  | free                        | 29.45 | 69.85  | 722.3786  | 722.3785  | 1E-04   | 362.1966 | 2 |
|     |     |                                 | K373:AD(1000.00)            | 35.85 | 30.98  | 923.49    | 923.4899  | 1E-04   | 462.7523 | 2 |
| 370 | 384 | C(+57.02)LVKGFYPSDIAVEW         | free                        | 39.06 | 36.16  | 1782.8708 | 1782.8651 | 0.0057  | 892.4427 | 2 |
| 385 | 408 | ESNGQPENNYK TTPVLDSDGSFF        | N393:Deamidation (NQ):10.03 | 38.71 | 69.47  | 2643.1714 | 2643.1613 | 0.0101  | 1322.593 | 2 |
|     |     |                                 | free                        | 38.33 | 90.11  | 2642.1834 | 2642.1773 | 0.0061  | 1322.099 | 2 |
| 395 | 407 | KTTTPVLDSDGSF                   | free                        | 31.18 | 120.41 | 1362.667  | 1362.6667 | 0.0003  | 682.3408 | 2 |
| 395 | 408 | KTTTPVLDSDGSFF                  | free                        | 37.32 | 128.74 | 1509.7378 | 1509.7352 | 0.0026  | 755.8762 | 2 |
|     |     |                                 | K395:AD(1000.00)            | 40.85 | 98.29  | 1710.851  | 1710.8465 | 0.0045  | 856.4328 | 2 |
| 395 | 410 | KTTTPVLDSDGSFFLY                | free                        | 41.49 | 18.86  | 1785.8862 | 1785.8825 | 0.0037  | 893.9504 | 2 |
|     |     |                                 | K395:AD(1000.00)            | 44.21 | 64.88  | 1986.999  | 1986.9939 | 0.0051  | 994.5068 | 2 |
| 411 | 426 | SKLTVDKSRWQGNVF                 | free                        | 29.44 | 102.39 | 1891.9946 | 1891.9904 | 0.0042  | 947.0046 | 2 |
| 411 | 420 | SKLTVDKSRW                      | free                        | 23.28 | 99.9   | 1218.6702 | 1218.6721 | -0.0019 | 407.2307 | 3 |
| 411 | 426 | SKLTVDKSRWQGNVF                 | free                        | 29.44 | 102.39 | 1891.9946 | 1891.9904 | 0.0042  | 947.0046 | 2 |
| 414 | 420 | TVDKSRW                         | free                        | 18.04 | 56.58  | 890.4598  | 890.461   | -0.0012 | 446.2372 | 2 |
| 414 | 426 | TVDKSRWQGNVF                    | free                        | 28.82 | 84.88  | 1563.7808 | 1563.7794 | 0.0014  | 782.8977 | 2 |
| 427 | 444 | SC(+57.02)SVMHEALHN(+98)HYTQKSL | free                        | 25.7  | 54.97  | 2141.9583 | 2141.9622 | -0.0039 | 714.9934 | 3 |
| 427 | 444 | SC(+57.02)SVMHEALHNHYTQKSL      | free                        | 25.21 | 77.95  | 2140.9794 | 2140.9782 | 0.0012  | 714.6671 | 3 |
| 440 | 449 | TKKSLSPG                        | free                        | 24.72 | 74.77  | 1016.5494 | 1016.5502 | -0.0008 | 509.282  | 2 |
| 440 | 444 | TQK(+201.11)SL                  | K442:AD_K(1000.00)          | 26.27 | 36.04  | 776.439   | 776.435   | 0.004   | 389.2268 | 2 |

| Light Chain_chymotrypsin |     |                                    |                                     |       |        |           |           |           |          |   |
|--------------------------|-----|------------------------------------|-------------------------------------|-------|--------|-----------|-----------|-----------|----------|---|
| Start                    | End | Peptide                            | PTM                                 | RT    | -10lgP | MWexp(Da) | MWthe(Da) | Error(Da) | m/z      | z |
| 1                        | 9   | DIQMTQSPS                          | free                                | 24.13 | 66.05  | 1005.4432 | 1005.4437 | -0.0005   | 503.7289 | 2 |
|                          |     |                                    | D1:NHS(1000.00)                     | 39.5  | 22.96  | 1220.5338 | 1220.5343 | -0.0005   | 611.2742 | 2 |
| 1                        | 11  | DIQMTQSPSSL                        | free                                | 31.11 | 89.83  | 1205.5598 | 1205.5598 | 0         | 603.7872 | 2 |
|                          |     |                                    | D1:NHS(1000.00)                     | 43.55 | 26.07  | 1420.6532 | 1420.6504 | 0.0028    | 711.3339 | 2 |
| 36                       | 47  | YQKPGKAPKLL                        | free                                | 22.75 | 38.09  | 1369.8069 | 1369.8081 | -0.0012   | 457.6096 | 3 |
|                          |     |                                    | K42:NHS(26.52)                      | 32.14 | 46.33  | 1584.9008 | 1584.8987 | 0.0021    | 793.4577 | 2 |
|                          |     |                                    | K39:NHS(1000.00);K42:NHS(64.77)     | 41.45 | 39.34  | 1799.995  | 1799.995  | 0         | 901.0048 | 2 |
| 37                       | 47  | QKPGKAPKLL                         | K39:NHS(1000.00);K45:NHS(73.31)     | 41.14 | 32.17  | 1636.9302 | 1636.926  | 0.0042    | 819.4724 | 2 |
| 99                       | 106 | GQGTKVEI                           | free                                | 22.57 | 51.53  | 830.45    | 830.4498  | 0.0002    | 416.2323 | 2 |
| 99                       | 107 | GQGTKVEIK                          | free                                | 14.45 | 17.22  | 958.5444  | 958.5447  | -0.0003   | 480.2795 | 2 |
| 99                       | 108 | GQGTKVEIK(+215.09)R                | K107:NHS(59.24)                     | 26.25 | 24.62  | 1329.7358 | 1329.7365 | -0.0007   | 665.8752 | 2 |
|                          |     |                                    | K103:NHS(1000.00);K107:NHS(1000.00) | 35.47 | 32.08  | 1544.828  | 1544.828  | 0         | 773.4213 | 2 |
| 99                       | 109 | GQGTKVEIK(+215.09)RT               | K107:NHS(48.12)                     | 26.72 | 26.12  | 1430.7831 | 1430.7841 | -0.001    | 477.935  | 3 |
| 103                      | 108 | KVEIK(+215.09)R                    | K107:NHS(63.97)                     | 25.54 | 19.7   | 986.5864  | 986.5873  | -0.0009   | 494.3005 | 2 |
| 93                       | 108 | TTPPTFGQGTK(+215.09)VEIK(+215.09)R | K103:NHS(1000.00);K107:NHS(1000.00) | 39.18 | 78.19  | 2189.1554 | 2189.1441 | 0.0113    | 1095.585 | 2 |
| 99                       | 107 | GQGTKVEIK                          | free                                | 14.45 | 17.22  | 958.5444  | 958.5447  | -0.0003   | 480.2795 | 2 |
| 107                      | 116 | KRTVAAPSVF                         | free                                | 26.62 | 44.88  | 1074.6172 | 1074.6186 | -0.0014   | 538.3159 | 2 |
| 117                      | 133 | IFPPSDEQLKSGTASVV                  | free                                | 32.26 | 58.18  | 1773.9156 | 1773.9149 | 0.0007    | 887.9651 | 2 |
| 117                      | 134 | IFPPSDEQLKSGTASVVC(+57.02)         | free                                | 31.31 | 61.85  | 1933.947  | 1933.9455 | 0.0015    | 967.9808 | 2 |
| 117                      | 135 | IFPPSDEQLKSGTASVVC(+57.02)L        | free                                | 36.14 | 99.05  | 2047.0314 | 2047.0296 | 0.0018    | 1024.523 | 2 |
| 126                      | 134 | KSGTASVVC(+57.02)                  | free                                | 15.16 | 39.86  | 907.4424  | 907.4433  | -0.0009   | 454.7285 | 2 |
| 126                      | 135 | KSGTASVVC(+57.02)L                 | free                                | 28.16 | 38.2   | 1020.5274 | 1020.5274 | 0         | 511.271  | 2 |
| 126                      | 136 | KSGTASVVC(+57.02)LL                | free                                | 34.77 | 36.69  | 1133.611  | 1133.6115 | -0.0005   | 567.8128 | 2 |
| 136                      | 148 | LNNFYPREAKVQW                      | free                                | 32.17 | 38.44  | 1663.8447 | 1663.847  | -0.0023   | 555.6222 | 3 |
|                          |     |                                    | K145:NHS(1000.00)                   | 39.58 | 69.15  | 1878.9402 | 1878.9377 | 0.0025    | 940.4774 | 2 |
| 137                      | 145 | NN(+98)FYPREAK                     | free                                | 22.25 | 44.5   | 1138.5406 | 1138.5407 | -1E-04    | 570.2776 | 2 |
|                          |     |                                    | free                                | 30.54 | 82.11  | 1550.7624 | 1550.763  | -0.0006   | 776.3885 | 2 |
| 137                      | 148 | NNFYPREAKVQW                       | K145:NHS(1000.00)                   | 38.41 | 71.68  | 1765.8554 | 1765.8536 | 0.0018    | 883.935  | 2 |



|     |     |                          |                                          |       |       |           |           |         |          |   |
|-----|-----|--------------------------|------------------------------------------|-------|-------|-----------|-----------|---------|----------|---|
| 138 | 148 | NFYBREAKVQW              | free                                     | 30.69 | 39.63 | 1436.7208 | 1436.7201 | 0.0007  | 719.3677 | 2 |
|     |     |                          | N138:Deamidation:44.79:K145:NHS(1000.00) | 41.71 | 20.92 | 1652.7958 | 1652.7947 | 0.0011  | 827.4052 | 2 |
|     |     |                          | K145:NHS(1000.00)                        | 38.73 | 61.87 | 1651.8116 | 1651.8107 | 0.0009  | 826.9131 | 2 |
| 140 | 148 | YPREAKVQW                | free                                     | 26.45 | 25.22 | 1175.6068 | 1175.6087 | -0.0019 | 588.8107 | 2 |
| 143 | 148 | EAKVQW                   | K145:NHS(1000.00)                        | 38.77 | 22.63 | 974.4826  | 974.4821  | 0.0005  | 488.2486 | 2 |
|     |     |                          | free                                     | 23.48 | 81.66 | 2729.2308 | 2729.2264 | -0.0044 | 910.7509 | 3 |
|     |     |                          | K169:NHS(68.03)                          | 30.61 | 68.1  | 2944.3274 | 2944.317  | 0.0104  | 1473.171 | 2 |
| 149 | 173 | KVDNALQSGNSQESVTEQDSKDSY | K149:NHS(1000.00);K169:NHS(1000.00)      | 36.85 | 29.29 | 3159.4101 | 3159.4076 | 0.0025  | 1054.144 | 3 |
|     |     |                          | K149:NHS(63.21)                          | 30.25 | 79.85 | 2944.3251 | 2944.317  | 0.0081  | 592.7429 | 3 |
| 153 | 173 | ALQSGNSQESVTEQDSKDSY     | free                                     | 22.87 | 89.76 | 2273.0014 | 2272.9931 | 0.0083  | 1137.508 | 2 |
| 155 | 173 | QSGNSQESVTEQDSKDSY       | free                                     | 20.64 | 68.67 | 2088.8774 | 2088.872  | 0.0054  | 1045.446 | 2 |
|     |     |                          | free                                     | 20.56 | 73.81 | 1960.8152 | 1960.8134 | 0.0018  | 981.4149 | 2 |
| 156 | 173 | SGNSQESVTEQDSKDSY        | K169:NHS(1000.00)                        | 30.65 | 90.07 | 2175.9094 | 2175.904  | 0.0054  | 1088.962 | 2 |
| 159 | 173 | SQESVTEQDSKDSY           | free                                     | 20.41 | 85.09 | 1702.72   | 1702.717  | 0.003   | 852.3673 | 2 |
| 180 | 186 | TLISKADY                 | free                                     | 19.25 | 27.08 | 796.3966  | 796.3967  | -1E-04  | 399.2056 | 2 |
|     |     |                          | K188:NHS(81.79)                          | 25.81 | 67.29 | 1405.6832 | 1405.6837 | -0.0005 | 703.8489 | 2 |
| 180 | 189 | TLISKADYEKH              | K183:NHS(1000.00);K188:NHS(1000.00)      | 36.05 | 63.97 | 1620.7738 | 1620.7743 | -0.0005 | 811.3942 | 2 |
| 180 | 192 | TLISKADYEKHKVY           | K188:NHS(1000.00);K190:NHS(120.29)       | 35.35 | 33.07 | 2011.0034 | 2011.001  | 0.0024  | 1006.509 | 2 |
| 182 | 189 | SKADYEKH                 | K188:NHS(120.29)                         | 22.64 | 35.76 | 1191.5512 | 1191.552  | -0.0008 | 596.7829 | 2 |
| 187 | 192 | EKHKVY                   | K188:NHS(28.86)                          | 24.21 | 29.4  | 1017.5234 | 1017.5243 | -0.0009 | 509.769  | 2 |
|     |     |                          | free                                     | 22.37 | 51.31 | 851.4386  | 851.4389  | -0.0003 | 426.7266 | 2 |
| 202 | 209 | SSPVTKSF                 | K207:NHS(1000.00)                        | 37.41 | 57.79 | 1066.5288 | 1066.5295 | -0.0007 | 534.2717 | 2 |

|       |     | Heavy chain_chymotrypsin |                  |       |        |           |           |           |           |   |
|-------|-----|--------------------------|------------------|-------|--------|-----------|-----------|-----------|-----------|---|
| Start | End | Peptide                  | PTM              | RT    | -10lgP | MWexp(Da) | MWthe(Da) | Error(Da) | m/z       | z |
| 1     | 11  | EVQLVESGGGL              | free             | 32.88 | 54.63  | 1086.557  | 1086.5557 | 0.0013    | 544.2858  | 2 |
|       |     |                          | E1:NHS(1000.00)  | 46.76 | 43.91  | 1301.646  | 1301.6463 | -0.0003   | 651.8303  | 2 |
|       |     |                          | free             | 36.56 | 104.27 | 3447.7744 | 3447.7744 | 0         | 1724.8945 | 2 |
|       |     |                          | E1:NHS(1000.00)  | 47.77 | 52.48  | 1940.0014 | 1939.9851 | 0.0163    | 971.008   | 2 |
| 28    | 33  | NIKDTY                   | free             | 18.16 | 34.46  | 752.3708  | 752.3705  | 0.0003    | 377.1927  | 2 |
| 37    | 47  | VRQAPGKGLEW              | free             | 27.13 | 96.04  | 1239.6738 | 1239.6724 | 0.0014    | 620.8442  | 2 |
|       |     |                          | K43:NHS(1000.00) | 37.69 | 94.23  | 1454.763  | 1454.763  | 0         | 728.3888  | 2 |
|       |     |                          | free             | 29.69 | 43.9   | 984.5022  | 984.5029  | -0.0007   | 493.2584  | 2 |
| 39    | 47  | QAPGKGLEW                | K43:NHS(1000.00) | 41.21 | 46.54  | 1199.5936 | 1199.5935 | 1E-04     | 600.8041  | 2 |

|     |     |                                |                   |       |       |           |           |         |          |   |
|-----|-----|--------------------------------|-------------------|-------|-------|-----------|-----------|---------|----------|---|
| 61  | 68  | ADSVKGRF                       | free              | 17.79 | 39.76 | 878.457   | 878.461   | -0.004  | 440.2358 | 2 |
|     |     |                                | K65:NHS(1000.00)  | 32.71 | 67.11 | 1093.551  | 1093.5516 | -0.0006 | 547.7828 | 2 |
| 58  | 68  | TRYADSVKGRF                    | K65:NHS(1000.00)  | 31.91 | 28.09 | 1513.7616 | 1513.7637 | -0.0021 | 505.5945 | 3 |
| 61  | 67  | ADSVKGR                        | K65:NHS(1000.00)  | 24.34 | 40.13 | 946.4812  | 946.4832  | -0.002  | 474.2479 | 2 |
| 63  | 68  | SVKGRF                         | K65:NHS(1000.00)  | 31.43 | 30.82 | 907.487   | 907.4876  | -0.0006 | 454.7508 | 2 |
| 69  | 77  | TISADTSKN                      | K76:NHS(1000.00)  | 28.22 | 63.12 | 1150.5452 | 1150.5466 | -0.0014 | 576.2799 | 2 |
|     |     |                                | free              | 22.4  | 44.37 | 1270.5988 | 1270.6041 | -0.0053 | 636.3067 | 2 |
| 69  | 80  | TISADTSKNTAY                   | K76:NHS(1000.00)  | 32.24 | 81.12 | 1485.6958 | 1485.6947 | 0.0011  | 743.8552 | 2 |
|     |     |                                | free              | 27.43 | 61.84 | 1383.6888 | 1383.6882 | 0.0006  | 692.8517 | 2 |
|     |     |                                | K76:NHS(1000.00)  | 37.39 | 68.59 | 1598.78   | 1598.7788 | 0.0012  | 800.3973 | 2 |
| 111 | 131 | GQGTLVTYSSASTKGPSVFPL          | free              | 38.36 | 43.04 | 2032.0894 | 2032.0841 | 0.0053  | 1017.052 | 2 |
| 116 | 127 | VTYSSASTKGPS                   | free              | 18.26 | 88.08 | 1119.577  | 1119.5772 | -0.0002 | 560.7958 | 2 |
|     |     |                                | free              | 29.15 | 94.49 | 1365.715  | 1365.714  | 0.001   | 683.8648 | 2 |
| 116 | 129 | VTYSSASTKGPSVF                 | K124:NHS(1000.00) | 38.91 | 80    | 1580.8016 | 1580.8046 | -0.003  | 791.4081 | 2 |
|     |     |                                | free              | 35.73 | 98.83 | 1575.8532 | 1575.8508 | 0.0024  | 788.9339 | 2 |
| 116 | 131 | VTYSSASTKGPSVFPL               | K124:NHS(1000.00) | 44.29 | 39.84 | 1790.9526 | 1790.9415 | 0.0111  | 896.4836 | 2 |
|     |     |                                | free              | 34.6  | 82.7  | 1830.974  | 1830.9727 | 0.0013  | 916.4943 | 2 |
| 116 | 134 | VTYSSASTKGPSVFPLAPS            | K124:NHS(1000.00) | 42.12 | 35.78 | 2046.0734 | 2046.0634 | 0.01    | 1024.044 | 2 |
|     |     |                                | free              | 31.12 | 84.09 | 2046.0999 | 2046.0997 | 0.0002  | 683.0406 | 3 |
|     |     |                                | K124:NHS(94.08)   | 38.19 | 86.52 | 2261.1927 | 2261.1903 | 0.0024  | 754.7382 | 3 |
| 116 | 145 | VTYSSASTKGPSVFPLAPSSKSTSGGTAAL | free              | 33.43 | 85.93 | 2791.4634 | 2791.4604 | 0.003   | 931.4951 | 3 |
| 118 | 131 | VSSASTKGPSVFPL                 | free              | 34.86 | 85.25 | 1375.7356 | 1375.7347 | 0.0009  | 688.8751 | 2 |
|     |     |                                | free              | 25.89 | 76.72 | 979.4972  | 979.4975  | -0.0003 | 490.7559 | 2 |
| 120 | 129 | SASTKGPSVF                     | K124:NHS(1000.00) | 37.89 | 34.77 | 1194.5888 | 1194.5881 | 0.0007  | 598.3017 | 2 |
|     |     |                                | free              | 34.56 | 77.48 | 1189.6338 | 1189.6343 | -0.0005 | 595.8242 | 2 |
| 120 | 131 | SASTKGPSVFPL                   | K124:NHS(1000.00) | 43.83 | 44    | 1404.7312 | 1404.7249 | 0.0063  | 703.3729 | 2 |
|     |     |                                | free              | 29.54 | 65.96 | 1659.8862 | 1659.8832 | 0.003   | 554.3027 | 3 |
|     |     |                                | K124:NHS(112.93)  | 37.52 | 72.97 | 1874.9758 | 1874.9738 | 0.002   | 938.4952 | 2 |
| 120 | 145 | SASTKGPSVFPLAPSSKSTSGGTAAL     | free              | 32.47 | 65.75 | 2405.2482 | 2405.2438 | 0.0044  | 802.7567 | 3 |
| 122 | 131 | STKGPSVFPL                     | free              | 34.63 | 57.28 | 1031.5644 | 1031.5652 | -0.0008 | 516.7895 | 2 |
| 122 | 145 | STKGPSVFPLAPSSKSTSGGTAAL       | free              | 32.5  | 71.61 | 2247.1755 | 2247.1747 | 0.0008  | 750.0658 | 3 |
|     |     |                                | free              | 34.77 | 37.12 | 944.5326  | 944.5331  | -0.0005 | 473.2736 | 2 |
| 123 | 131 | TKGPSVFPL                      | K124:NHS(1000.00) | 44.57 | 28.4  | 1159.6252 | 1159.6237 | 0.0015  | 580.8199 | 2 |

|     |     |                                           |                                     |       |        |           |           |         |          |   |
|-----|-----|-------------------------------------------|-------------------------------------|-------|--------|-----------|-----------|---------|----------|---|
| 124 | 131 | KGPSVFPL                                  | free                                | 34.64 | 60.85  | 843.4854  | 843.4854  | 0       | 422.75   | 2 |
|     |     |                                           | K124:NHS(1000.00)                   | 44.69 | 21.63  | 1058.5712 | 1058.576  | -0.0048 | 530.2929 | 2 |
| 124 | 134 | KGPSVFPLAPS                               | free                                | 33.89 | 27.69  | 1098.6068 | 1098.6073 | -0.0005 | 550.3107 | 2 |
| 124 | 136 | KGPSVFPLAPSSK                             | free                                | 29.46 | 70.51  | 1313.7336 | 1313.7343 | -0.0007 | 438.9185 | 3 |
| 124 | 145 | KGPSVFPLAPSSKSTSGGTAAL                    | free                                | 32.43 | 69.38  | 2059.0938 | 2059.095  | -0.0012 | 687.3719 | 3 |
| 130 | 145 | PLAPSSKSTSGGTAAL                          | free                                | 24.89 | 92.37  | 1443.7582 | 1443.7569 | 0.0013  | 722.8864 | 2 |
|     |     |                                           | K137:NHS(1000.00)                   | 35.07 | 77.3   | 1658.8478 | 1658.8475 | 0.0003  | 830.4312 | 2 |
| 134 | 145 | SSKSTSGGTAAL                              | free                                | 17.42 | 45.47  | 1065.5288 | 1065.5302 | -0.0014 | 533.7717 | 2 |
| 128 | 145 | VFPLAPSSKSTSGGTAAL                        | K137:NHS(1000.00)                   | 41.76 | 32.95  | 1904.9946 | 1904.9844 | 0.0102  | 953.5046 | 2 |
| 132 | 145 | APSSKSTSGGTAAL                            | K137:NHS(1000.00)                   | 31.8  | 45.22  | 1448.7118 | 1448.7107 | 0.0011  | 725.3632 | 2 |
| 137 | 150 | STSGGTAALGC(+57.02)LVK                    | free                                | 20.84 | 20.79  | 1320.6782 | 1320.6782 | 0       | 661.3464 | 2 |
| 146 | 152 | GC(+57.02)LVKDY                           | free                                | 23.86 | 50.89  | 853.4004  | 853.4004  | 0       | 427.7075 | 2 |
| 146 | 159 | GC(+57.02)LVKDYFPEPVTV                    | free                                | 39.83 | 83.49  | 1622.8076 | 1622.8015 | 0.0061  | 812.4111 | 2 |
| 146 | 161 | GC(+57.02)LVKDYFPEPVTVSW                  | free                                | 44.31 | 102.97 | 1895.9142 | 1895.9128 | 0.0014  | 948.9644 | 2 |
| 148 | 161 | LVKDYFPEPVTVSW                            | free                                | 40.43 | 56.64  | 1678.8634 | 1678.8607 | 0.0027  | 840.439  | 2 |
| 149 | 159 | VKDYFPEPVTV                               | free                                | 32.19 | 62.38  | 1292.6628 | 1292.6653 | -0.0025 | 647.3387 | 2 |
| 149 | 161 | VKDYFPEPVTVSW                             | free                                | 43.85 | 90.76  | 1565.7796 | 1565.7766 | 0.003   | 783.8971 | 2 |
| 202 | 212 | IC(+57.02)NVNHNKPSNT                      | free                                | 11.86 | 50.89  | 1282.61   | 1282.6088 | -0.0012 | 642.3123 | 2 |
|     |     |                                           | K208:NHS(1000.00)                   | 25.84 | 64.3   | 1497.7012 | 1497.6994 | 0.0018  | 749.8579 | 2 |
| 222 | 227 | SC(+57.02)DKTH                            | K225:NHS(1000.00)                   | 20.25 | 30.3   | 961.3916  | 961.3923  | -0.0007 | 481.7031 | 2 |
| 222 | 238 | SC(+57.02)DKTHTC(+57.02)PPC(+57.02)PAPELL | K225:NHS(1000.00)                   | 36.28 | 105.75 | 2196.9714 | 2196.9602 | 0.0112  | 1099.493 | 2 |
|     |     |                                           | free                                | 27.33 | 66.66  | 1154.67   | 1154.6699 | 1E-04   | 385.8973 | 3 |
| 245 | 254 | LFPKPKDITL                                | K249:NHS(11.22)                     | 37.87 | 39.25  | 1369.76   | 1369.7605 | -0.0005 | 685.8873 | 2 |
| 245 | 254 | LFPKPKDITL                                | free                                | 14.99 | 22.6   | 1154.67   | 1154.6699 | 1E-04   | 385.8973 | 3 |
| 255 | 263 | MISKTPEVT                                 | free                                | 22.82 | 50.62  | 1032.5268 | 1032.5274 | -0.0006 | 517.2707 | 2 |
| 256 | 263 | ISRTP EVT                                 | free                                | 19.31 | 20.19  | 901.4864  | 901.4869  | -0.0005 | 451.7505 | 2 |
| 256 | 264 | ISRTP EVC(+57.02)                         | free                                | 21.66 | 48.43  | 1061.5134 | 1061.5175 | -0.0041 | 531.764  | 2 |
| 256 | 278 | ISRTP EVC(+57.02)VVDVSHEDPEVKF            | free                                | 35.15 | 67.5   | 2641.304  | 2641.3058 | -0.0018 | 661.3333 | 4 |
| 264 | 278 | C(+57.02)VVDVSHEDPEVKF                    | free                                | 32.14 | 75.96  | 1757.8284 | 1757.8295 | -0.0011 | 586.9501 | 3 |
| 265 | 278 | VVDVSHEDPEVKF                             | free                                | 31.29 | 91.56  | 1597.7996 | 1597.7988 | 0.0008  | 799.9071 | 2 |
|     |     |                                           | K277:NHS(1000.00)                   | 38.79 | 80.03  | 1812.8954 | 1812.8894 | 0.006   | 907.455  | 2 |
|     |     |                                           | free                                | 17.67 | 27.09  | 1828.8632 | 1828.8591 | 0.0041  | 915.4389 | 2 |
| 289 | 303 | NAKTKPREEQYN(+98)STY                      | K293:NHS(39.97)                     | 25.99 | 33.79  | 2043.9574 | 2043.9497 | 0.0077  | 1022.986 | 2 |
|     |     |                                           | K291:NHS(1000.00);K293:NHS(1000.00) | 34.09 | 79.68  | 2259.0454 | 2259.0403 | 0.0051  | 1130.53  | 2 |

|     |     |                          |                                     |       |       |           |           |         |          |   |
|-----|-----|--------------------------|-------------------------------------|-------|-------|-----------|-----------|---------|----------|---|
| 289 | 299 | N(+98)AKTKPREEQY         | K291:NHS(12.81)                     | 25.63 | 15.67 | 1578.7614 | 1579.65   | -0.8886 | 527.2611 | 3 |
|     |     |                          | K291:NHS(1000.00);K293:NHS(1000.00) | 35.53 | 34.09 | 1793.8562 | 1793.8544 | 0.0018  | 897.9354 | 2 |
| 289 | 299 | NAKTKPREEQY              | K291:NHS(7.32)                      | 23.45 | 23.36 | 1577.7801 | 1577.7797 | 0.0004  | 526.934  | 3 |
|     |     |                          | K291:NHS(1000.00);K293:NHS(1000.00) | 33.33 | 76.73 | 1792.867  | 1792.8703 | -0.0033 | 897.4408 | 2 |
| 290 | 299 | AKTKPREEQY               | K291:NHS(6.59)                      | 23.09 | 27.85 | 1463.7351 | 1463.7368 | -0.0017 | 488.919  | 3 |
|     |     |                          | K291:NHS(1000.00);K293:NHS(1000.00) | 33.35 | 28.99 | 1678.8294 | 1678.8274 | 0.002   | 840.422  | 2 |
| 292 | 303 | TKPREEQYN(+98)STY        | free                                | 19.53 | 66.66 | 1515.6858 | 1515.6841 | 0.0017  | 758.8502 | 2 |
|     |     |                          | K293:NHS(1000.00)                   | 28.59 | 39.25 | 1730.7828 | 1730.7747 | 0.0081  | 866.3987 | 2 |
| 310 | 322 | TVLHQDWLN(+98)GKEY       | free                                | 31.01 | 64.56 | 1602.7671 | 1602.7678 | -0.0007 | 535.263  | 3 |
|     |     |                          | K320:NHS(1000.00)                   | 38.78 | 93.6  | 1817.8612 | 1817.8584 | 0.0028  | 909.9379 | 2 |
| 313 | 322 | HQDWLN(+98)GKEY          | free                                | 27    | 80.65 | 1289.5674 | 1289.5676 | -0.0002 | 645.791  | 2 |
| 317 | 322 | LN(+98)GKEY              | free                                | 17.35 | 32.75 | 723.3442  | 723.3439  | 0.0003  | 362.6794 | 2 |
| 323 | 328 | KC(+57.02)KVSNN          | K323:NHS(27.16)                     | 22.7  | 43.03 | 949.4646  | 949.4651  | -0.0005 | 475.7396 | 2 |
| 323 | 329 | KC(+57.02)K(+215.09)VSNK | K325:NHS(8.22)                      | 19.59 | 17.86 | 1077.5595 | 1077.5601 | -0.0006 | 360.1938 | 3 |
| 323 | 337 | KC(+57.02)KVSNNALPAPIEK  | K323:NHS(1000.00);K329:NHS(5.26)    | 35.36 | 54.35 | 2112.1371 | 2112.1361 | 0.001   | 705.053  | 3 |
| 325 | 337 | KVSNNALPAPIEK            | K325:NHS(1000.00);K329:NHS(150.63)  | 37.69 | 63.71 | 1823.9978 | 1824.0105 | -0.0127 | 913.0062 | 2 |
| 326 | 337 | VSNK(+215.09)ALPAPIEK    | K329:NHS(146.50)                    | 33.53 | 71.57 | 1480.8248 | 1480.8249 | -1E-04  | 741.4197 | 2 |
|     |     |                          | free                                | 21.86 | 67.32 | 1079.6334 | 1079.6338 | -0.0004 | 540.824  | 2 |
| 328 | 337 | NKALPAPIEK               | K329:NHS(108.52)                    | 33.45 | 51.22 | 1294.7246 | 1294.7245 | 1E-04   | 648.3696 | 2 |
|     |     |                          | free                                | 21.22 | 48.05 | 965.5912  | 965.5909  | 0.0003  | 483.8029 | 2 |
| 329 | 337 | KALPAPIEK                | K329:NHS(150.89)                    | 33.33 | 71.95 | 1180.6814 | 1180.6815 | -1E-04  | 591.348  | 2 |
|     |     |                          | free                                | 21.99 | 65.12 | 1066.6384 | 1066.6386 | -0.0002 | 534.3265 | 2 |
| 329 | 338 | KALPAPIEKT               | K337:NHS(112.87)                    | 33.1  | 65.25 | 1281.7294 | 1281.7292 | 0.0002  | 641.872  | 2 |
|     |     |                          | free                                | 26.33 | 61.6  | 1266.7568 | 1266.7547 | 0.0021  | 634.3857 | 2 |
| 329 | 340 | KALPAPIEKTIS             | K337:NHS(82.59)                     | 36.73 | 72.91 | 1481.8452 | 1481.8453 | -1E-04  | 741.9299 | 2 |
| 329 | 341 | KALPAPIEKTISK            | free                                | 24.05 | 50.73 | 1394.8458 | 1394.8497 | -0.0039 | 465.9559 | 3 |
| 330 | 337 | ALPAPIEK                 | free                                | 24.88 | 20.62 | 837.4956  | 837.496   | -0.0004 | 419.7551 | 2 |
|     |     |                          | free                                | 31.52 | 59.7  | 1051.6266 | 1051.6277 | -0.0011 | 526.8206 | 2 |
| 330 | 339 | ALPAPIEKTI               | K337:NHS(1000.00)                   | 42.28 | 15.86 | 1266.709  | 1266.7183 | -0.0093 | 634.3618 | 2 |
| 330 | 340 | ALPAPIEKTIS              | free                                | 30.29 | 59.93 | 1138.6592 | 1138.6597 | -0.0005 | 570.3369 | 2 |
| 330 | 342 | ALPAPIEKTISKA            | K337:NHS(58.92)                     | 38.41 | 58.47 | 1552.8818 | 1552.8824 | -0.0006 | 777.4482 | 2 |
| 338 | 352 | TISKAK(+215.09)GQPREPQVY | K343:NHS(27.16)                     | 33.04 | 23.62 | 1916.0061 | 1916.0116 | -0.0055 | 639.676  | 3 |
| 341 | 352 | KAKGQPREPQVY             | free                                | 18    | 22.77 | 1399.755  | 1399.7572 | -0.0022 | 467.5923 | 3 |

|     |     |                         |                   |       |        |           |           |         |          |   |
|-----|-----|-------------------------|-------------------|-------|--------|-----------|-----------|---------|----------|---|
| 342 | 352 | AKGQPREPQVY             | free              | 20.07 | 61.63  | 1271.6622 | 1271.6622 | 0       | 636.8384 | 2 |
|     |     |                         | K343:NHS(1000.00) | 29.38 | 69.41  | 1486.7512 | 1486.7528 | -0.0016 | 744.3829 | 2 |
| 343 | 352 | KGQPREPQVY              | free              | 21.94 | 59.93  | 1200.6242 | 1200.6251 | -0.0009 | 601.3194 | 2 |
|     |     |                         | K343:NHS(1000.00) | 29.11 | 65.42  | 1415.717  | 1415.7157 | 0.0013  | 708.8658 | 2 |
| 342 | 347 | AKGQPR                  | K343:NHS(1000.00) | 21.07 | 22.53  | 870.4682  | 870.4671  | 0.0011  | 436.2414 | 2 |
| 362 | 368 | TKNQVSL                 | free              | 21.42 | 56.47  | 788.4394  | 788.4392  | 0.0002  | 395.227  | 2 |
| 353 | 364 | TLPPSREEMTKN            | K363:NHS(1000.00) | 29.78 | 32.24  | 1616.7866 | 1616.7828 | 0.0038  | 809.4006 | 2 |
| 353 | 368 | TLPPSREEMTKNQVSL        | K363:NHS(1000.00) | 35.38 | 18.85  | 2044.0274 | 2044.0259 | 0.0015  | 1023.021 | 2 |
| 369 | 375 | TC(+57.02)LVKGF         | free              | 29.49 | 57.92  | 823.4236  | 823.4262  | -0.0026 | 412.7191 | 2 |
| 370 | 375 | C(+57.02)LVKGF          | free              | 28.99 | 75.29  | 722.3788  | 722.3785  | 0.0003  | 362.1967 | 2 |
| 370 | 384 | C(+57.02)LVKGFYPSDIAVEW | free              | 39.97 | 65.25  | 1782.8698 | 1782.8651 | 0.0047  | 892.4422 | 2 |
| 371 | 384 | LVKGFYPSDIAVEW          | free              | 40.77 | 76.68  | 1622.8354 | 1622.8344 | 0.001   | 812.425  | 2 |
| 374 | 384 | GFYPSDIAVEW             | free              | 44.4  | 75.62  | 1282.5882 | 1282.587  | 0.0012  | 642.3014 | 2 |
| 385 | 394 | ESNGQ(+98)PEN(+98)NY    | free              | 20.06 | 15.44  | 1152.422  | 1152.4207 | 0.0013  | 577.2183 | 2 |
| 385 | 394 | ESN(+98)GQPENNY         | free              | 19.87 | 61.58  | 1151.4366 | 1151.4367 | -1E-04  | 576.7256 | 2 |
|     |     |                         | free              | 30.48 | 104.83 | 1362.6676 | 1362.6667 | 0.0009  | 682.3411 | 2 |
| 395 | 407 | KTTPVLDSDGSF            | K395:NHS(1000.00) | 39.61 | 63.53  | 1577.7592 | 1577.7573 | 0.0019  | 789.8869 | 2 |
|     |     |                         | free              | 36.61 | 88     | 1509.743  | 1509.7352 | 0.0078  | 755.8788 | 2 |
| 395 | 408 | KTTPVLDSDGSFF           | K395:NHS(1000.00) | 44.59 | 26     | 1724.8242 | 1724.8258 | -0.0016 | 863.4194 | 2 |
| 415 | 420 | VDKSRW                  | K417:NHS(1000.00) | 24.68 | 32.63  | 1004.5022 | 1004.5039 | -0.0017 | 503.2584 | 2 |

| start-end | Peptide                                    | m/z     | z | pep_score | Modification of AD (#) | RT    | -10lgP | MWexp(Da) | MWthe(Da) | Error(Da) |
|-----------|--------------------------------------------|---------|---|-----------|------------------------|-------|--------|-----------|-----------|-----------|
| 245-254   | LFPKPKDTL                                  | 578.341 | 2 | 19.57     | K249,K251              | 30.17 | 31.18  | 1154.6669 | 1154.668  | -0.0011   |
| 202-212   | IC(+57.02)NVN(+0.98)HKPSNT                 | 642.804 | 2 | 18.9      | K208                   | 54.64 | 53.48  | 1283.5919 | 1283.593  | -0.0011   |
| 105-116   | EIKRTVAAPSVF                               | 659.38  | 2 | 18.77     | K107                   | 13.27 | 24.29  | 1316.7441 | 1316.7452 | -0.0011   |
| 353-364   | TLPPSREEMTKN                               | 701.854 | 2 | 18.12     | K363                   | 13.63 | 22.2   | 1401.6915 | 1401.6936 | -0.0021   |
| 279-303   | NWYVDGVEVHNAKTPREE<br>Q(+0.98)YN(+0.98)STY | 758.105 | 4 | 18.3      | K291,K293              | 50.47 | 22.58  | 3028.391  | 3028.392  | -0.001    |
| 310-322   | TVLHQ(+0.98)DWLN(+0.98)GK<br>EY            | 802.881 | 2 | 19.18     | K320                   | 57.17 | 76.32  | 1603.7482 | 1603.7472 | 0.001     |

## Supplementary Method

### Experiment for payload linker synthesis and conjugation to Her-IgG-PEG-AD

#### A. Synthesis of DBCO-linker-payload.

##### 1. synthesis of DBCO-PEG4-DM1

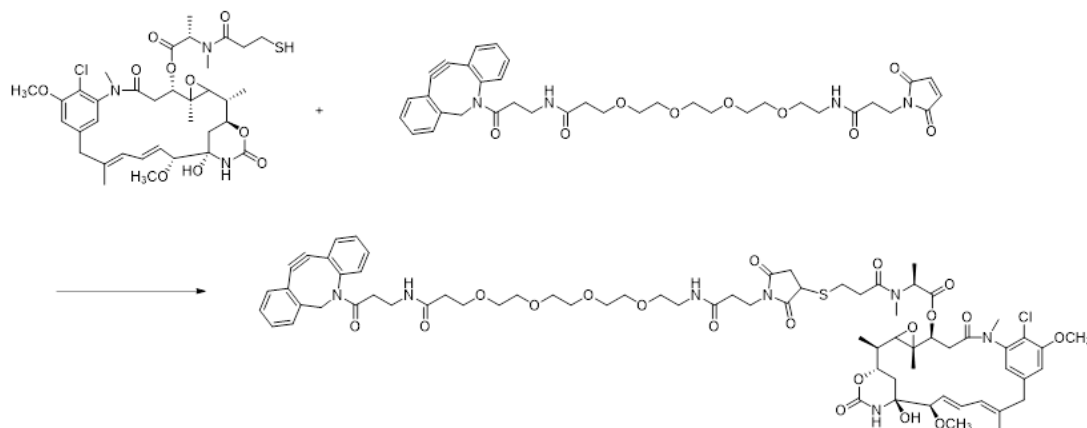

The DBCO-PEG4- maleimide and DM1 were commercial available. The DBCO-PEG4- maleimide (50mg, 1.0eq) was dissolved in acetonitrile and pH 7.4 phosphate buffer (v : v/2 : 1). DM1 (60 mg, 1.0eq) was added into the stirred solution and stirred at room temperature for 2 hours. After the reaction was complete, the reaction mixture was extracted with DCM. Then, the organic layer was washed with brine and dried over MgSO<sub>4</sub>. The organic solvent was removed under reduced pressure. The residue was purified by column chromatography with methanol/dichloromethane to afford white powder (69.4 mg, 66%).

##### 2. synthesis of DBCO-MMAF

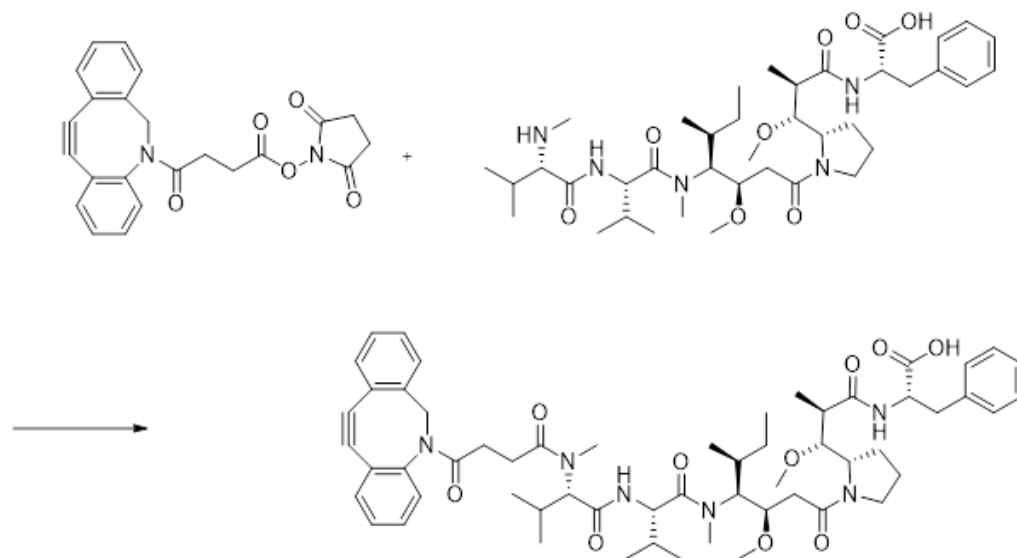

The DBCO-NHS and MMAF were commercial available. The DBCO-NHS (100mg, 1.0eq) was dissolved in 3mL DCM and 1.5mL DMF. MMAF (1.2eq) and DIPEA (2eq) was added into the stirred solution and stirred at room temperature for 16 hours. After the reaction was complete, the reaction mixture was extracted with DCM. Then, the organic layer was washed with brine and dried over MgSO<sub>4</sub>. The organic solvent was removed under reduced pressure. The residue was purified by column chromatography with methanol/dichloromethane to afford white powder (63.3 mg, 25%).

## B. Scheme of payload conjugation to Her-IgG-PEG-AD through click chemistry.

c). ADC conjugation

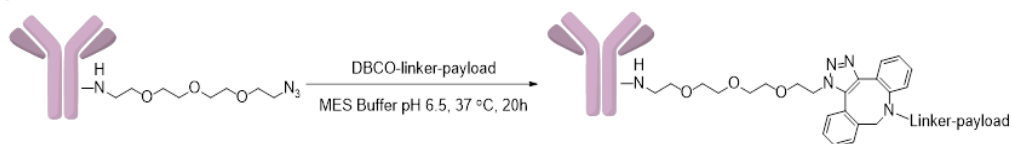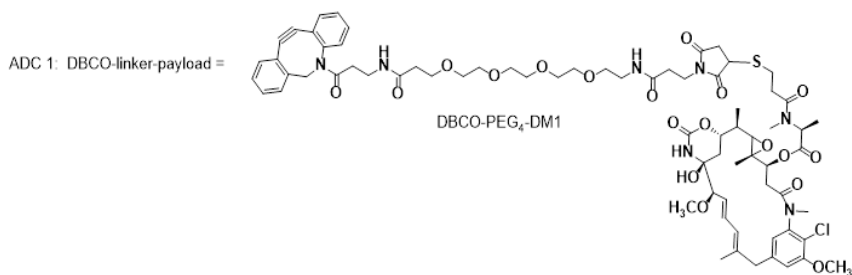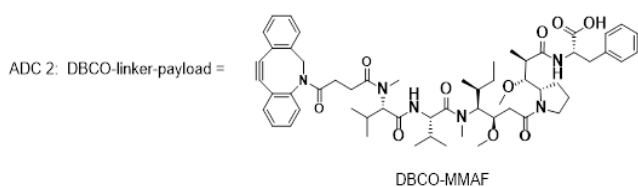

Supplement: 41598_2021_743_MOESM1_ESM.pdf [file 41598_2021_743_MOESM1_ESM.pdf]
